# Supplementary material for: Biomedical Potential of the Neglected Molluscivorous and Vermivorous Conus Species
Source: MDPI journal article supplement (doi:10.3390/md20020105), 2022-01-27
Supplement: s1 [file s1]

## Supplementary

# Biomedical Potential of the Neglected Molluscivorous and Vermivorous *Conus* Species

**Table S1** Conidae list and their feeding habits information

| Number | If Present on the tree | Genus              | Species            | Feeding Habits | Other Remarks |
|--------|------------------------|--------------------|--------------------|----------------|---------------|
| 1      | N                      | <i>Conasprella</i> | <i>ageri</i>       | †              |               |
| 2      | N                      | <i>Conasprella</i> | <i>aquitana</i>    | †              |               |
| 3      | N                      | <i>Conasprella</i> | <i>aturensis</i>   | †              |               |
| 4      | N                      | <i>Conasprella</i> | <i>berwerthi</i>   | †              |               |
| 5      | N                      | <i>Conasprella</i> | <i>burckhardti</i> | †              |               |
| 6      | N                      | <i>Conasprella</i> | <i>cercadensis</i> | †              |               |
| 7      | N                      | <i>Conasprella</i> | <i>imitator</i>    | †              |               |
| 8      | N                      | <i>Conasprella</i> | <i>kitteredgi</i>  | †              |               |
| 9      | N                      | <i>Conasprella</i> | <i>minutissima</i> | †              |               |
| 10     | N                      | <i>Conasprella</i> | <i>stenostoma</i>  | †              |               |
| 11     | N                      | <i>Conasprella</i> | <i>subturrita</i>  | †              |               |
| 12     | Y                      | <i>Conus</i>       | <i>amadis</i>      | Molluscivore   |               |
| 13     | Y                      | <i>Conus</i>       | <i>ammiralis</i>   | Molluscivore   |               |
| 14     | Y                      | <i>Conus</i>       | <i>araneosus</i>   | Molluscivore   |               |
| 15     | Y                      | <i>Conus</i>       | <i>aulicus</i>     | Molluscivore   |               |
| 16     | Y                      | <i>Conus</i>       | <i>aureus</i>      | Molluscivore   |               |
| 17     | Y                      | <i>Conus</i>       | <i>auricomus</i>   | Molluscivore   |               |
| 18     | Y                      | <i>Conus</i>       | <i>bandanus</i>    | Molluscivore   |               |
| 19     | Y                      | <i>Conus</i>       | <i>bengalensis</i> | Molluscivore   |               |
| 20     | Y                      | <i>Conus</i>       | <i>canonicus</i>   | Molluscivore   |               |
| 21     | Y                      | <i>Conus</i>       | <i>crocatus</i>    | Molluscivore   |               |
| 22     | Y                      | <i>Conus</i>       | <i>dalli</i>       | Molluscivore   |               |
| 23     | Y                      | <i>Conus</i>       | <i>episcopatus</i> | Molluscivore   |               |
| 24     | Y                      | <i>Conus</i>       | <i>furvus</i>      | Molluscivore   |               |

|    |   |              |                         |              |
|----|---|--------------|-------------------------|--------------|
| 25 | Y | <i>Conus</i> | <i>gloriamaris</i>      | Molluscivore |
| 26 | Y | <i>Conus</i> | <i>imelmani</i>         | Molluscivore |
| 27 | Y | <i>Conus</i> | <i>jucundus</i>         | Molluscivore |
| 28 | Y | <i>Conus</i> | <i>legatus</i>          | Molluscivore |
| 29 | Y | <i>Conus</i> | <i>locumtenens</i>      | Molluscivore |
| 30 | Y | <i>Conus</i> | <i>lohri</i>            | Molluscivore |
| 31 | Y | <i>Conus</i> | <i>magnificus</i>       | Molluscivore |
| 32 | Y | <i>Conus</i> | <i>marmoreus</i>        | Molluscivore |
| 33 | Y | <i>Conus</i> | <i>natalis</i>          | Molluscivore |
| 34 | Y | <i>Conus</i> | <i>omaria</i>           | Molluscivore |
| 35 | Y | <i>Conus</i> | <i>pennaceus</i>        | Molluscivore |
| 36 | Y | <i>Conus</i> | <i>retifer</i>          | Molluscivore |
| 37 | Y | <i>Conus</i> | <i>textile</i>          | Molluscivore |
| 38 | Y | <i>Conus</i> | <i>thalassiarachus</i>  | Molluscivore |
| 39 | Y | <i>Conus</i> | <i>thomae</i>           | Molluscivore |
| 40 | Y | <i>Conus</i> | <i>victoriae</i>        | Molluscivore |
| 41 | N | <i>Conus</i> | <i>archiepiscopus</i>   | Molluscivore |
| 42 | N | <i>Conus</i> | <i>praelatus</i>        | Molluscivore |
| 43 | N | <i>Conus</i> | <i>purus</i>            | Molluscivore |
| 44 | N | <i>Conus</i> | <i>abbas</i>            | Molluscivore |
| 45 | N | <i>Conus</i> | <i>auratinus</i>        | Molluscivore |
| 46 | N | <i>Conus</i> | <i>barbieri</i>         | Molluscivore |
| 47 | N | <i>Conus</i> | <i>behelokensis</i>     | Molluscivore |
| 48 | N | <i>Conus</i> | <i>cordigera</i>        | Molluscivore |
| 49 | N | <i>Conus</i> | <i>echo</i>             | Molluscivore |
| 50 | N | <i>Conus</i> | <i>glorioceanus</i>     | Molluscivore |
| 51 | N | <i>Conus</i> | <i>hamanni</i>          | Molluscivore |
| 52 | N | <i>Conus</i> | <i>kawamurai</i>        | Molluscivore |
| 53 | N | <i>Conus</i> | <i>lamberti</i>         | Molluscivore |
| 54 | N | <i>Conus</i> | <i>laueri</i>           | Molluscivore |
| 55 | N | <i>Conus</i> | <i>madagascariensis</i> | Molluscivore |
| 56 | N | <i>Conus</i> | <i>marchionatus</i>     | Molluscivore |

|    |   |                      |                       |                          |                 |
|----|---|----------------------|-----------------------|--------------------------|-----------------|
| 57 | N | <i>Conus</i>         | <i>milneedwardsi</i>  | Molluscivore             |                 |
| 58 | N | <i>Conus</i>         | <i>natalaurantius</i> | Molluscivore             |                 |
| 59 | N | <i>Conus</i>         | <i>nodulosus</i>      | Molluscivore             |                 |
| 60 | N | <i>Conus</i>         | <i>scottjordani</i>   | Molluscivore             |                 |
| 61 | N | <i>Conus</i>         | <i>tagaroe</i>        | Molluscivore             |                 |
| 62 | N | <i>Conus</i>         | <i>telatus</i>        | Molluscivore             |                 |
| 63 | N | <i>Profundiconus</i> | <i>dondani</i>        | Molluscivore             |                 |
| 64 | N | <i>Profundiconus</i> | <i>pacificus</i>      | Molluscivore             |                 |
| 65 | Y | <i>Conus</i>         | <i>dusaveli</i>       | Molluscivore / Piscivore |                 |
| 66 | Y | <i>Conus</i>         | <i>purpurascens</i>   | Piscivore                | earthworms      |
| 67 | Y | <i>Conus</i>         | <i>ermineus</i>       | Piscivore                | Mollusc/Octopus |
| 68 | N | <i>Conus</i>         | <i>subulatus</i>      | Piscivore                | nomen dubium    |
| 69 | Y | <i>Conus</i>         | <i>achatinus</i>      | Piscivore                |                 |
| 70 | Y | <i>Conus</i>         | <i>andamanensis</i>   | Piscivore                |                 |
| 71 | Y | <i>Conus</i>         | <i>aurisiacus</i>     | Piscivore                |                 |
| 72 | Y | <i>Conus</i>         | <i>barthelemyi</i>    | Piscivore                |                 |
| 73 | Y | <i>Conus</i>         | <i>catus</i>          | Piscivore                |                 |
| 74 | Y | <i>Conus</i>         | <i>cervus</i>         | Piscivore                |                 |
| 75 | Y | <i>Conus</i>         | <i>cinereus</i>       | Piscivore                |                 |
| 76 | Y | <i>Conus</i>         | <i>circumcissus</i>   | Piscivore                |                 |
| 77 | Y | <i>Conus</i>         | <i>consors</i>        | Piscivore                |                 |
| 78 | Y | <i>Conus</i>         | <i>cuvieri</i>        | Piscivore                |                 |
| 79 | Y | <i>Conus</i>         | <i>floccatus</i>      | Piscivore                |                 |
| 80 | Y | <i>Conus</i>         | <i>gauguini</i>       | Piscivore                |                 |
| 81 | Y | <i>Conus</i>         | <i>geographus</i>     | Piscivore                |                 |
| 82 | Y | <i>Conus</i>         | <i>grangeri</i>       | Piscivore                |                 |
| 83 | Y | <i>Conus</i>         | <i>gubernator</i>     | Piscivore                |                 |
| 84 | Y | <i>Conus</i>         | <i>koukae</i>         | Piscivore                |                 |
| 85 | Y | <i>Conus</i>         | <i>magus</i>          | Piscivore                |                 |
| 86 | Y | <i>Conus</i>         | <i>monachus</i>       | Piscivore                |                 |
| 87 | Y | <i>Conus</i>         | <i>mucronatus</i>     | Piscivore                |                 |
| 88 | Y | <i>Conus</i>         | <i>nigropunctatus</i> | Piscivore                |                 |
| 89 | Y | <i>Conus</i>         | <i>obscurus</i>       | Piscivore                |                 |

|     |   |                      |                        |           |
|-----|---|----------------------|------------------------|-----------|
| 90  | Y | <i>Conus</i>         | <i>parius</i>          | Piscivore |
| 91  | Y | <i>Conus</i>         | <i>proximus</i>        | Piscivore |
| 92  | Y | <i>Conus</i>         | <i>simonis</i>         | Piscivore |
| 93  | Y | <i>Conus</i>         | <i>stercusmuscarum</i> | Piscivore |
| 94  | Y | <i>Conus</i>         | <i>striatus</i>        | Piscivore |
| 95  | Y | <i>Conus</i>         | <i>striolatus</i>      | Piscivore |
| 96  | Y | <i>Conus</i>         | <i>sutanorcum</i>      | Piscivore |
| 97  | Y | <i>Conus</i>         | <i>tulipa</i>          | Piscivore |
| 98  | Y | <i>Profundiconus</i> | <i>kanakinus</i>       | Piscivore |
| 99  | Y | <i>Profundiconus</i> | <i>profundorum</i>     | Piscivore |
| 100 | N | <i>Conus</i>         | <i>morrisoni</i>       | Piscivore |
| 101 | N | <i>Conus</i>         | <i>adamsonii</i>       | Piscivore |
| 102 | N | <i>Conus</i>         | <i>alabaster</i>       | Piscivore |
| 103 | N | <i>Conus</i>         | <i>alexandrei</i>      | Piscivore |
| 104 | N | <i>Conus</i>         | <i>angioiorum</i>      | Piscivore |
| 105 | N | <i>Conus</i>         | <i>arafurensis</i>     | Piscivore |
| 106 | N | <i>Conus</i>         | <i>asiaticus</i>       | Piscivore |
| 107 | N | <i>Conus</i>         | <i>balabacensis</i>    | Piscivore |
| 108 | N | <i>Conus</i>         | <i>barbara</i>         | Piscivore |
| 109 | N | <i>Conus</i>         | <i>boutetorum</i>      | Piscivore |
| 110 | N | <i>Conus</i>         | <i>cebuensis</i>       | Piscivore |
| 111 | N | <i>Conus</i>         | <i>chiapponorum</i>    | Piscivore |
| 112 | N | <i>Conus</i>         | <i>collisus</i>        | Piscivore |
| 113 | N | <i>Conus</i>         | <i>dampierensis</i>    | Piscivore |
| 114 | N | <i>Conus</i>         | <i>eldredi</i>         | Piscivore |
| 115 | N | <i>Conus</i>         | <i>fischoederi</i>     | Piscivore |
| 116 | N | <i>Conus</i>         | <i>fragilissimus</i>   | Piscivore |
| 117 | N | <i>Conus</i>         | <i>fulmen</i>          | Piscivore |
| 118 | N | <i>Conus</i>         | <i>gilvus</i>          | Piscivore |
| 119 | N | <i>Conus</i>         | <i>giorossii</i>       | Piscivore |
| 120 | N | <i>Conus</i>         | <i>goudeyi</i>         | Piscivore |
| 121 | N | <i>Conus</i>         | <i>habui</i>           | Piscivore |

|     |   |                    |                      |                          |
|-----|---|--------------------|----------------------|--------------------------|
| 122 | N | <i>Conus</i>       | <i>jickelii</i>      | Piscivore                |
| 123 | N | <i>Conus</i>       | <i>julii</i>         | Piscivore                |
| 124 | N | <i>Conus</i>       | <i>leobottonii</i>   | Piscivore                |
| 125 | N | <i>Conus</i>       | <i>leobrerai</i>     | Piscivore                |
| 126 | N | <i>Conus</i>       | <i>lizardensis</i>   | Piscivore                |
| 127 | N | <i>Conus</i>       | <i>mariae</i>        | Piscivore                |
| 128 | N | <i>Conus</i>       | <i>martinianus</i>   | Piscivore                |
| 129 | N | <i>Conus</i>       | <i>niederhoeferi</i> | Piscivore                |
| 130 | N | <i>Conus</i>       | <i>robini</i>        | Piscivore                |
| 131 | N | <i>Conus</i>       | <i>rouxi</i>         | Piscivore                |
| 132 | N | <i>Conus</i>       | <i>salzmanni</i>     | Piscivore                |
| 133 | N | <i>Conus</i>       | <i>santini</i>       | Piscivore                |
| 134 | N | <i>Conus</i>       | <i>sartii</i>        | Piscivore                |
| 135 | N | <i>Conus</i>       | <i>scalptus</i>      | Piscivore                |
| 136 | N | <i>Conus</i>       | <i>sculpturatus</i>  | Piscivore                |
| 137 | N | <i>Conus</i>       | <i>sertacinctus</i>  | Piscivore                |
| 138 | N | <i>Conus</i>       | <i>sogodensis</i>    | Piscivore                |
| 139 | N | <i>Conus</i>       | <i>solangeae</i>     | Piscivore                |
| 140 | N | <i>Conus</i>       | <i>solomonensis</i>  | Piscivore                |
| 141 | N | <i>Conus</i>       | <i>stramineus</i>    | Piscivore                |
| 142 | N | <i>Conus</i>       | <i>timorensis</i>    | Piscivore                |
| 143 | N | <i>Conus</i>       | <i>vappereai</i>     | Piscivore                |
| 144 | N | <i>Conus</i>       | <i>vicweei</i>       | Piscivore                |
| 145 | N | <i>Conus</i>       | <i>yemenensis</i>    | Piscivore                |
| 146 | N | <i>Conus</i>       | <i>zandbergeni</i>   | Piscivore                |
| 147 | N | <i>Conus</i>       | <i>zapatensis</i>    | Piscivore                |
| 148 | N | <i>Conus</i>       | <i>zebra</i>         | Piscivore                |
| 149 | Y | <i>Conus</i>       | <i>bullatus</i>      | Piscivore / Molluscivore |
| 150 | Y | <i>Conasprella</i> | <i>aphrodite</i>     | Vermivore                |
| 151 | Y | <i>Conasprella</i> | <i>arcuata</i>       | Vermivore                |
| 152 | Y | <i>Conasprella</i> | <i>baileyi</i>       | Vermivore                |
| 153 | Y | <i>Conasprella</i> | <i>comatosa</i>      | Vermivore                |

|     |   |                    |                         |           |
|-----|---|--------------------|-------------------------|-----------|
| 154 | Y | <i>Conasprella</i> | <i>delessertii</i>      | Vermivore |
| 155 | Y | <i>Conasprella</i> | <i>eugrammata</i>       | Vermivore |
| 156 | Y | <i>Conasprella</i> | <i>guidopoppei</i>      | Vermivore |
| 157 | Y | <i>Conasprella</i> | <i>hopwoodi</i>         | Vermivore |
| 158 | Y | <i>Conasprella</i> | <i>ichinoseana</i>      | Vermivore |
| 159 | Y | <i>Conasprella</i> | <i>kimioi</i>           | Vermivore |
| 160 | Y | <i>Conasprella</i> | <i>longurionis</i>      | Vermivore |
| 161 | Y | <i>Conasprella</i> | <i>mazei</i>            | Vermivore |
| 162 | Y | <i>Conasprella</i> | <i>memiae</i>           | Vermivore |
| 163 | Y | <i>Conasprella</i> | <i>mindana</i>          | Vermivore |
| 164 | Y | <i>Conasprella</i> | <i>orbignyi</i>         | Vermivore |
| 165 | Y | <i>Conasprella</i> | <i>otohimeae</i>        | Vermivore |
| 166 | Y | <i>Conasprella</i> | <i>pagoda</i>           | Vermivore |
| 167 | Y | <i>Conasprella</i> | <i>perplexa</i>         | Vermivore |
| 168 | Y | <i>Conasprella</i> | <i>pseudokimioi</i>     | Vermivore |
| 169 | Y | <i>Conasprella</i> | <i>puncticulata</i>     | Vermivore |
| 170 | Y | <i>Conasprella</i> | <i>stearnsii</i>        | Vermivore |
| 171 | Y | <i>Conasprella</i> | <i>tornata</i>          | Vermivore |
| 172 | Y | <i>Conasprella</i> | <i>viminea</i>          | Vermivore |
| 173 | Y | <i>Conasprella</i> | <i>wakayamaensis</i>    | Vermivore |
| 174 | Y | <i>Conus</i>       | <i>abbreviatus</i>      | Vermivore |
| 175 | Y | <i>Conus</i>       | <i>acutangulus</i>      | Vermivore |
| 176 | Y | <i>Conus</i>       | <i>alconnelli</i>       | Vermivore |
| 177 | Y | <i>Conus</i>       | <i>amphiurgus</i>       | Vermivore |
| 178 | Y | <i>Conus</i>       | <i>anabathrum</i>       | Vermivore |
| 179 | Y | <i>Conus</i>       | <i>anemone</i>          | Vermivore |
| 180 | Y | <i>Conus</i>       | <i>angasi</i>           | Vermivore |
| 181 | Y | <i>Conus</i>       | <i>antoniaensis</i>     | Vermivore |
| 182 | Y | <i>Conus</i>       | <i>antoniomonteiroi</i> | Vermivore |
| 183 | Y | <i>Conus</i>       | <i>arangoi</i>          | Vermivore |
| 184 | Y | <i>Conus</i>       | <i>archon</i>           | Vermivore |
| 185 | Y | <i>Conus</i>       | <i>ardisiaceus</i>      | Vermivore |

|     |   |              |                         |           |
|-----|---|--------------|-------------------------|-----------|
| 186 | Y | <i>Conus</i> | <i>arenatus</i>         | Vermivore |
| 187 | Y | <i>Conus</i> | <i>aristophanes</i>     | Vermivore |
| 188 | Y | <i>Conus</i> | <i>ateralbus</i>        | Vermivore |
| 189 | Y | <i>Conus</i> | <i>augur</i>            | Vermivore |
| 190 | Y | <i>Conus</i> | <i>australis</i>        | Vermivore |
| 191 | Y | <i>Conus</i> | <i>balteatus</i>        | Vermivore |
| 192 | Y | <i>Conus</i> | <i>bartschi</i>         | Vermivore |
| 193 | Y | <i>Conus</i> | <i>belairensis</i>      | Vermivore |
| 194 | Y | <i>Conus</i> | <i>betulinus</i>        | Vermivore |
| 195 | Y | <i>Conus</i> | <i>biliosus</i>         | Vermivore |
| 196 | Y | <i>Conus</i> | <i>boavistensis</i>     | Vermivore |
| 197 | Y | <i>Conus</i> | <i>boeticus</i>         | Vermivore |
| 198 | Y | <i>Conus</i> | <i>borgesi</i>          | Vermivore |
| 199 | Y | <i>Conus</i> | <i>bruguieresi</i>      | Vermivore |
| 200 | Y | <i>Conus</i> | <i>brunneus</i>         | Vermivore |
| 201 | Y | <i>Conus</i> | <i>buxeus</i>           | Vermivore |
| 202 | Y | <i>Conus</i> | <i>buxeus loroisii</i>  | Vermivore |
| 203 | Y | <i>Conus</i> | <i>byssinus</i>         | Vermivore |
| 204 | Y | <i>Conus</i> | <i>calhetae</i>         | Vermivore |
| 205 | Y | <i>Conus</i> | <i>cancellatus</i>      | Vermivore |
| 206 | Y | <i>Conus</i> | <i>capitanellus</i>     | Vermivore |
| 207 | Y | <i>Conus</i> | <i>capitaneus</i>       | Vermivore |
| 208 | Y | <i>Conus</i> | <i>characteristicus</i> | Vermivore |
| 209 | Y | <i>Conus</i> | <i>cedonulli</i>        | Vermivore |
| 210 | Y | <i>Conus</i> | <i>chaldaeus</i>        | Vermivore |
| 211 | Y | <i>Conus</i> | <i>chiangi</i>          | Vermivore |
| 212 | Y | <i>Conus</i> | <i>cloveri</i>          | Vermivore |
| 213 | Y | <i>Conus</i> | <i>coelinae</i>         | Vermivore |
| 214 | Y | <i>Conus</i> | <i>cofeae</i>           | Vermivore |
| 215 | Y | <i>Conus</i> | <i>corallinus</i>       | Vermivore |
| 216 | Y | <i>Conus</i> | <i>coronatus</i>        | Vermivore |
| 217 | Y | <i>Conus</i> | <i>crotchii</i>         | Vermivore |

|     |   |              |                       |           |
|-----|---|--------------|-----------------------|-----------|
| 218 | Y | <i>Conus</i> | <i>cuneolus</i>       | Vermivore |
| 219 | Y | <i>Conus</i> | <i>curassaviensis</i> | Vermivore |
| 220 | Y | <i>Conus</i> | <i>curralensis</i>    | Vermivore |
| 221 | Y | <i>Conus</i> | <i>damottai</i>       | Vermivore |
| 222 | Y | <i>Conus</i> | <i>daucus</i>         | Vermivore |
| 223 | Y | <i>Conus</i> | <i>dayriti</i>        | Vermivore |
| 224 | Y | <i>Conus</i> | <i>decoratus</i>      | Vermivore |
| 225 | Y | <i>Conus</i> | <i>delanoyae</i>      | Vermivore |
| 226 | Y | <i>Conus</i> | <i>denizi</i>         | Vermivore |
| 227 | Y | <i>Conus</i> | <i>diadema</i>        | Vermivore |
| 228 | Y | <i>Conus</i> | <i>diminutus</i>      | Vermivore |
| 229 | Y | <i>Conus</i> | <i>distans</i>        | Vermivore |
| 230 | Y | <i>Conus</i> | <i>dorotheae</i>      | Vermivore |
| 231 | Y | <i>Conus</i> | <i>dorreensis</i>     | Vermivore |
| 232 | Y | <i>Conus</i> | <i>ebraeus</i>        | Vermivore |
| 233 | Y | <i>Conus</i> | <i>echinophilus</i>   | Vermivore |
| 234 | Y | <i>Conus</i> | <i>emaciatius</i>     | Vermivore |
| 235 | Y | <i>Conus</i> | <i>excelsus</i>       | Vermivore |
| 236 | Y | <i>Conus</i> | <i>eximius</i>        | Vermivore |
| 237 | Y | <i>Conus</i> | <i>felitae</i>        | Vermivore |
| 238 | Y | <i>Conus</i> | <i>fergusoni</i>      | Vermivore |
| 239 | Y | <i>Conus</i> | <i>fernandesi</i>     | Vermivore |
| 240 | Y | <i>Conus</i> | <i>ferrugineus</i>    | Vermivore |
| 241 | Y | <i>Conus</i> | <i>figulinus</i>      | Vermivore |
| 242 | Y | <i>Conus</i> | <i>flavescens</i>     | Vermivore |
| 243 | Y | <i>Conus</i> | <i>flavidus</i>       | Vermivore |
| 244 | Y | <i>Conus</i> | <i>flavus</i>         | Vermivore |
| 245 | Y | <i>Conus</i> | <i>floridulus</i>     | Vermivore |
| 246 | Y | <i>Conus</i> | <i>frigidus</i>       | Vermivore |
| 247 | Y | <i>Conus</i> | <i>fuscoflavus</i>    | Vermivore |
| 248 | Y | <i>Conus</i> | <i>genuanus</i>       | Vermivore |
| 249 | Y | <i>Conus</i> | <i>gladiator</i>      | Vermivore |



|     |   |              |                     |           |
|-----|---|--------------|---------------------|-----------|
| 250 | Y | <i>Conus</i> | <i>glans</i>        | Vermivore |
| 251 | Y | <i>Conus</i> | <i>gondwanensis</i> | Vermivore |
| 252 | Y | <i>Conus</i> | <i>gonsaloi</i>     | Vermivore |
| 253 | Y | <i>Conus</i> | <i>gradatus</i>     | Vermivore |
| 254 | Y | <i>Conus</i> | <i>grahami</i>      | Vermivore |
| 255 | Y | <i>Conus</i> | <i>granum</i>       | Vermivore |
| 256 | Y | <i>Conus</i> | <i>guanche</i>      | Vermivore |
| 257 | Y | <i>Conus</i> | <i>guinaicus</i>    | Vermivore |
| 258 | Y | <i>Conus</i> | <i>hieroglyphus</i> | Vermivore |
| 259 | Y | <i>Conus</i> | <i>hirasei</i>      | Vermivore |
| 260 | Y | <i>Conus</i> | <i>imperialis</i>   | Vermivore |
| 261 | Y | <i>Conus</i> | <i>infinitus</i>    | Vermivore |
| 262 | Y | <i>Conus</i> | <i>infrenatus</i>   | Vermivore |
| 263 | Y | <i>Conus</i> | <i>inscriptus</i>   | Vermivore |
| 264 | Y | <i>Conus</i> | <i>isabelarum</i>   | Vermivore |
| 265 | Y | <i>Conus</i> | <i>janus</i>        | Vermivore |
| 266 | Y | <i>Conus</i> | <i>josephinae</i>   | Vermivore |
| 267 | Y | <i>Conus</i> | <i>judaeus</i>      | Vermivore |
| 268 | Y | <i>Conus</i> | <i>kintoki</i>      | Vermivore |
| 269 | Y | <i>Conus</i> | <i>klemae</i>       | Vermivore |
| 270 | Y | <i>Conus</i> | <i>lenavati</i>     | Vermivore |
| 271 | Y | <i>Conus</i> | <i>leopardus</i>    | Vermivore |
| 272 | Y | <i>Conus</i> | <i>lischkeanus</i>  | Vermivore |
| 273 | Y | <i>Conus</i> | <i>litoglyphus</i>  | Vermivore |
| 274 | Y | <i>Conus</i> | <i>litteratus</i>   | Vermivore |
| 275 | Y | <i>Conus</i> | <i>lividus</i>      | Vermivore |
| 276 | Y | <i>Conus</i> | <i>longilineus</i>  | Vermivore |
| 277 | Y | <i>Conus</i> | <i>lozeti</i>       | Vermivore |
| 278 | Y | <i>Conus</i> | <i>lugubris</i>     | Vermivore |
| 279 | Y | <i>Conus</i> | <i>luteus</i>       | Vermivore |
| 280 | Y | <i>Conus</i> | <i>lynceus</i>      | Vermivore |
| 281 | Y | <i>Conus</i> | <i>madecassinus</i> | Vermivore |

|     |   |              |                    |           |
|-----|---|--------------|--------------------|-----------|
| 282 | Y | <i>Conus</i> | <i>maioensis</i>   | Vermivore |
| 283 | Y | <i>Conus</i> | <i>medoci</i>      | Vermivore |
| 284 | Y | <i>Conus</i> | <i>melvilli</i>    | Vermivore |
| 285 | Y | <i>Conus</i> | <i>mercator</i>    | Vermivore |
| 286 | Y | <i>Conus</i> | <i>miles</i>       | Vermivore |
| 287 | Y | <i>Conus</i> | <i>milliaris</i>   | Vermivore |
| 288 | Y | <i>Conus</i> | <i>miruchae</i>    | Vermivore |
| 289 | Y | <i>Conus</i> | <i>mitratus</i>    | Vermivore |
| 290 | Y | <i>Conus</i> | <i>monile</i>      | Vermivore |
| 291 | Y | <i>Conus</i> | <i>moreleti</i>    | Vermivore |
| 292 | Y | <i>Conus</i> | <i>mozambicus</i>  | Vermivore |
| 293 | Y | <i>Conus</i> | <i>muriculatus</i> | Vermivore |
| 294 | Y | <i>Conus</i> | <i>mus</i>         | Vermivore |
| 295 | Y | <i>Conus</i> | <i>musicus</i>     | Vermivore |
| 296 | Y | <i>Conus</i> | <i>mustelinus</i>  | Vermivore |
| 297 | Y | <i>Conus</i> | <i>namocanus</i>   | Vermivore |
| 298 | Y | <i>Conus</i> | <i>navarroi</i>    | Vermivore |
| 299 | Y | <i>Conus</i> | <i>neptunus</i>    | Vermivore |
| 300 | Y | <i>Conus</i> | <i>nucleus</i>     | Vermivore |
| 301 | Y | <i>Conus</i> | <i>nux</i>         | Vermivore |
| 302 | Y | <i>Conus</i> | <i>ochroleucus</i> | Vermivore |
| 303 | Y | <i>Conus</i> | <i>orion</i>       | Vermivore |
| 304 | Y | <i>Conus</i> | <i>parvatus</i>    | Vermivore |
| 305 | Y | <i>Conus</i> | <i>patricius</i>   | Vermivore |
| 306 | Y | <i>Conus</i> | <i>pertusus</i>    | Vermivore |
| 307 | Y | <i>Conus</i> | <i>philippii</i>   | Vermivore |
| 308 | Y | <i>Conus</i> | <i>pictus</i>      | Vermivore |
| 309 | Y | <i>Conus</i> | <i>planorbis</i>   | Vermivore |
| 310 | Y | <i>Conus</i> | <i>plinthis</i>    | Vermivore |
| 311 | Y | <i>Conus</i> | <i>poormani</i>    | Vermivore |
| 312 | Y | <i>Conus</i> | <i>praecellens</i> | Vermivore |
| 313 | Y | <i>Conus</i> | <i>princeps</i>    | Vermivore |

|     |   |              |                       |           |
|-----|---|--------------|-----------------------|-----------|
| 314 | Y | <i>Conus</i> | <i>pulcher</i>        | Vermivore |
| 315 | Y | <i>Conus</i> | <i>pulicarius</i>     | Vermivore |
| 316 | Y | <i>Conus</i> | <i>queenslandis</i>   | Vermivore |
| 317 | Y | <i>Conus</i> | <i>quercinus</i>      | Vermivore |
| 318 | Y | <i>Conus</i> | <i>rattus</i>         | Vermivore |
| 319 | Y | <i>Conus</i> | <i>rausilvai</i>      | Vermivore |
| 320 | Y | <i>Conus</i> | <i>recurvus</i>       | Vermivore |
| 321 | Y | <i>Conus</i> | <i>regius</i>         | Vermivore |
| 322 | Y | <i>Conus</i> | <i>regonae</i>        | Vermivore |
| 323 | Y | <i>Conus</i> | <i>richeri</i>        | Vermivore |
| 324 | Y | <i>Conus</i> | <i>roeckeli</i>       | Vermivore |
| 325 | Y | <i>Conus</i> | <i>roseorapum</i>     | Vermivore |
| 326 | Y | <i>Conus</i> | <i>sandwichensis</i>  | Vermivore |
| 327 | Y | <i>Conus</i> | <i>sanguinolentus</i> | Vermivore |
| 328 | Y | <i>Conus</i> | <i>shikamai</i>       | Vermivore |
| 329 | Y | <i>Conus</i> | <i>spectrum</i>       | Vermivore |
| 330 | Y | <i>Conus</i> | <i>sponsalis</i>      | Vermivore |
| 331 | Y | <i>Conus</i> | <i>spurius</i>        | Vermivore |
| 332 | Y | <i>Conus</i> | <i>striatellus</i>    | Vermivore |
| 333 | Y | <i>Conus</i> | <i>sugimotonis</i>    | Vermivore |
| 334 | Y | <i>Conus</i> | <i>sulcatus</i>       | Vermivore |
| 335 | Y | <i>Conus</i> | <i>suturatus</i>      | Vermivore |
| 336 | Y | <i>Conus</i> | <i>tabidus</i>        | Vermivore |
| 337 | Y | <i>Conus</i> | <i>taeniatus</i>      | Vermivore |
| 338 | Y | <i>Conus</i> | <i>tenuistriatus</i>  | Vermivore |
| 339 | Y | <i>Conus</i> | <i>terebra</i>        | Vermivore |
| 340 | Y | <i>Conus</i> | <i>tinianus</i>       | Vermivore |
| 341 | Y | <i>Conus</i> | <i>tribblei</i>       | Vermivore |
| 342 | Y | <i>Conus</i> | <i>trochulus</i>      | Vermivore |
| 343 | Y | <i>Conus</i> | <i>unifasciatus</i>   | Vermivore |
| 344 | Y | <i>Conus</i> | <i>varius</i>         | Vermivore |
| 345 | Y | <i>Conus</i> | <i>ventricosus</i>    | Vermivore |

|     |   |                      |                      |           |
|-----|---|----------------------|----------------------|-----------|
| 346 | Y | <i>Conus</i>         | <i>venulatus</i>     | Vermivore |
| 347 | Y | <i>Conus</i>         | <i>verdensis</i>     | Vermivore |
| 348 | Y | <i>Conus</i>         | <i>vexillum</i>      | Vermivore |
| 349 | Y | <i>Conus</i>         | <i>villeginii</i>    | Vermivore |
| 350 | Y | <i>Conus</i>         | <i>viola</i>         | Vermivore |
| 351 | Y | <i>Conus</i>         | <i>violaceus</i>     | Vermivore |
| 352 | Y | <i>Conus</i>         | <i>virgatus</i>      | Vermivore |
| 353 | Y | <i>Conus</i>         | <i>virgo</i>         | Vermivore |
| 354 | Y | <i>Conus</i>         | <i>vittatus</i>      | Vermivore |
| 355 | Y | <i>Conus</i>         | <i>vitulinus</i>     | Vermivore |
| 356 | Y | <i>Conus</i>         | <i>voluminalis</i>   | Vermivore |
| 357 | Y | <i>Conus</i>         | <i>vulcanus</i>      | Vermivore |
| 358 | Y | <i>Conus</i>         | <i>xicoi</i>         | Vermivore |
| 359 | Y | <i>Conus</i>         | <i>zeylanicus</i>    | Vermivore |
| 360 | Y | <i>Conus</i>         | <i>zonatus</i>       | Vermivore |
| 361 | Y | <i>Profundiconus</i> | <i>vaubani</i>       | Vermivore |
| 362 | Y | <i>Conus</i>         | <i>eversoni</i>      | Vermivore |
| 363 | Y | <i>Conus</i>         | <i>generalis</i>     | Vermivore |
| 364 | Y | <i>Conus</i>         | <i>martensi</i>      | Vermivore |
| 365 | N | <i>Conasprella</i>   | <i>jaspideus</i>     | Vermivore |
| 366 | N | <i>Conasprella</i>   | <i>hivana</i>        | Vermivore |
| 367 | N | <i>Conasprella</i>   | <i>lentiginosa</i>   | Vermivore |
| 368 | N | <i>Conasprella</i>   | <i>traversiana</i>   | Vermivore |
| 369 | N | <i>Conus</i>         | <i>abrolhosensis</i> | Vermivore |
| 370 | N | <i>Conus</i>         | <i>advertex</i>      | Vermivore |
| 371 | N | <i>Conus</i>         | <i>aemulus</i>       | Vermivore |
| 372 | N | <i>Conus</i>         | <i>africanus</i>     | Vermivore |
| 373 | N | <i>Conus</i>         | <i>alainallaryi</i>  | Vermivore |
| 374 | N | <i>Conus</i>         | <i>albuquerquei</i>  | Vermivore |
| 375 | N | <i>Conus</i>         | <i>alexandrinus</i>  | Vermivore |
| 376 | N | <i>Conus</i>         | <i>aplustre</i>      | Vermivore |
| 377 | N | <i>Conus</i>         | <i>armadillo</i>     | Vermivore |

|     |   |              |                        |           |
|-----|---|--------------|------------------------|-----------|
| 378 | N | <i>Conus</i> | <i>artoptus</i>        | Vermivore |
| 379 | N | <i>Conus</i> | <i>aureonimbosus</i>   | Vermivore |
| 380 | N | <i>Conus</i> | <i>austroviola</i>     | Vermivore |
| 381 | N | <i>Conus</i> | <i>baeri</i>           | Vermivore |
| 382 | N | <i>Conus</i> | <i>bahamensis</i>      | Vermivore |
| 383 | N | <i>Conus</i> | <i>bayani</i>          | Vermivore |
| 384 | N | <i>Conus</i> | <i>bayeri</i>          | Vermivore |
| 385 | N | <i>Conus</i> | <i>belizeanus</i>      | Vermivore |
| 386 | N | <i>Conus</i> | <i>bellocqae</i>       | Vermivore |
| 387 | N | <i>Conus</i> | <i>bellulus</i>        | Vermivore |
| 388 | N | <i>Conus</i> | <i>bessei</i>          | Vermivore |
| 389 | N | <i>Conus</i> | <i>binghamae</i>       | Vermivore |
| 390 | N | <i>Conus</i> | <i>bonfigliolii</i>    | Vermivore |
| 391 | N | <i>Conus</i> | <i>boui</i>            | Vermivore |
| 392 | N | <i>Conus</i> | <i>broderipii</i>      | Vermivore |
| 393 | N | <i>Conus</i> | <i>brunneobandatus</i> | Vermivore |
| 394 | N | <i>Conus</i> | <i>burryae</i>         | Vermivore |
| 395 | N | <i>Conus</i> | <i>caillaudii</i>      | Vermivore |
| 396 | N | <i>Conus</i> | <i>capreolus</i>       | Vermivore |
| 397 | N | <i>Conus</i> | <i>carcellesi</i>      | Vermivore |
| 398 | N | <i>Conus</i> | <i>clarus</i>          | Vermivore |
| 399 | N | <i>Conus</i> | <i>clerii</i>          | Vermivore |
| 400 | N | <i>Conus</i> | <i>cocceus</i>         | Vermivore |
| 401 | N | <i>Conus</i> | <i>colmani</i>         | Vermivore |
| 402 | N | <i>Conus</i> | <i>colombi</i>         | Vermivore |
| 403 | N | <i>Conus</i> | <i>coltrorum</i>       | Vermivore |
| 404 | N | <i>Conus</i> | <i>compressus</i>      | Vermivore |
| 405 | N | <i>Conus</i> | <i>conspersus</i>      | Vermivore |
| 406 | N | <i>Conus</i> | <i>cuna</i>            | Vermivore |
| 407 | N | <i>Conus</i> | <i>cyanostoma</i>      | Vermivore |
| 408 | N | <i>Conus</i> | <i>cylindraceus</i>    | Vermivore |
| 409 | N | <i>Conus</i> | <i>desidiosus</i>      | Vermivore |

|     |   |              |                        |           |
|-----|---|--------------|------------------------|-----------|
| 410 | N | <i>Conus</i> | <i>edaphus</i>         | Vermivore |
| 411 | N | <i>Conus</i> | <i>escondidai</i>      | Vermivore |
| 412 | N | <i>Conus</i> | <i>estivali</i>        | Vermivore |
| 413 | N | <i>Conus</i> | <i>felix</i>           | Vermivore |
| 414 | N | <i>Conus</i> | <i>fijisulcatus</i>    | Vermivore |
| 415 | N | <i>Conus</i> | <i>flammeacolor</i>    | Vermivore |
| 416 | N | <i>Conus</i> | <i>gabelishi</i>       | Vermivore |
| 417 | N | <i>Conus</i> | <i>garywilsoni</i>     | Vermivore |
| 418 | N | <i>Conus</i> | <i>gigasulcatus</i>    | Vermivore |
| 419 | N | <i>Conus</i> | <i>glaucus</i>         | Vermivore |
| 420 | N | <i>Conus</i> | <i>glenni</i>          | Vermivore |
| 421 | N | <i>Conus</i> | <i>glicksteini</i>     | Vermivore |
| 422 | N | <i>Conus</i> | <i>gloriakiensis</i>   | Vermivore |
| 423 | N | <i>Conus</i> | <i>goajira</i>         | Vermivore |
| 424 | N | <i>Conus</i> | <i>hazinorum</i>       | Vermivore |
| 425 | N | <i>Conus</i> | <i>helgae</i>          | Vermivore |
| 426 | N | <i>Conus</i> | <i>hennequini</i>      | Vermivore |
| 427 | N | <i>Conus</i> | <i>honkeri</i>         | Vermivore |
| 428 | N | <i>Conus</i> | <i>hyaena</i>          | Vermivore |
| 429 | N | <i>Conus</i> | <i>hyaena concolor</i> | Vermivore |
| 430 | N | <i>Conus</i> | <i>iodostoma</i>       | Vermivore |
| 431 | N | <i>Conus</i> | <i>joroi</i>           | Vermivore |
| 432 | N | <i>Conus</i> | <i>kaiserae</i>        | Vermivore |
| 433 | N | <i>Conus</i> | <i>kermadecensis</i>   | Vermivore |
| 434 | N | <i>Conus</i> | <i>kersteni</i>        | Vermivore |
| 435 | N | <i>Conus</i> | <i>kevani</i>          | Vermivore |
| 436 | N | <i>Conus</i> | <i>kremerorum</i>      | Vermivore |
| 437 | N | <i>Conus</i> | <i>kuroharai</i>       | Vermivore |
| 438 | N | <i>Conus</i> | <i>leekremeri</i>      | Vermivore |
| 439 | N | <i>Conus</i> | <i>lemniscatus</i>     | Vermivore |
| 440 | N | <i>Conus</i> | <i>levistimpsoni</i>   | Vermivore |
| 441 | N | <i>Conus</i> | <i>lienardi</i>        | Vermivore |

|     |   |              |                        |           |
|-----|---|--------------|------------------------|-----------|
| 442 | N | <i>Conus</i> | <i>lightbourni</i>     | Vermivore |
| 443 | N | <i>Conus</i> | <i>limpusi</i>         | Vermivore |
| 444 | N | <i>Conus</i> | <i>lindae</i>          | Vermivore |
| 445 | N | <i>Conus</i> | <i>malacanus</i>       | Vermivore |
| 446 | N | <i>Conus</i> | <i>maya</i>            | Vermivore |
| 447 | N | <i>Conus</i> | <i>mcbridei</i>        | Vermivore |
| 448 | N | <i>Conus</i> | <i>nanus</i>           | Vermivore |
| 449 | N | <i>Conus</i> | <i>nielsenae</i>       | Vermivore |
| 450 | N | <i>Conus</i> | <i>oishii</i>          | Vermivore |
| 451 | N | <i>Conus</i> | <i>papilliferus</i>    | Vermivore |
| 452 | N | <i>Conus</i> | <i>papuensis</i>       | Vermivore |
| 453 | N | <i>Conus</i> | <i>parascalaris</i>    | Vermivore |
| 454 | N | <i>Conus</i> | <i>patae</i>           | Vermivore |
| 455 | N | <i>Conus</i> | <i>patriceae</i>       | Vermivore |
| 456 | N | <i>Conus</i> | <i>paukstisi</i>       | Vermivore |
| 457 | N | <i>Conus</i> | <i>peasei</i>          | Vermivore |
| 458 | N | <i>Conus</i> | <i>penchaszadehi</i>   | Vermivore |
| 459 | N | <i>Conus</i> | <i>petergabrieli</i>   | Vermivore |
| 460 | N | <i>Conus</i> | <i>portobeloensis</i>  | Vermivore |
| 461 | N | <i>Conus</i> | <i>poulosi</i>         | Vermivore |
| 462 | N | <i>Conus</i> | <i>pretiosus</i>       | Vermivore |
| 463 | N | <i>Conus</i> | <i>primus</i>          | Vermivore |
| 464 | N | <i>Conus</i> | <i>quiquandoni</i>     | Vermivore |
| 465 | N | <i>Conus</i> | <i>ranonganus</i>      | Vermivore |
| 466 | N | <i>Conus</i> | <i>recluzianus</i>     | Vermivore |
| 467 | N | <i>Conus</i> | <i>reductaspiralis</i> | Vermivore |
| 468 | N | <i>Conus</i> | <i>ritae</i>           | Vermivore |
| 469 | N | <i>Conus</i> | <i>rufimaculosus</i>   | Vermivore |
| 470 | N | <i>Conus</i> | <i>salletae</i>        | Vermivore |
| 471 | N | <i>Conus</i> | <i>santanaensis</i>    | Vermivore |
| 472 | N | <i>Conus</i> | <i>saragasae</i>       | Vermivore |
| 473 | N | <i>Conus</i> | <i>shaskyi</i>         | Vermivore |

|     |   |                      |                       |                          |
|-----|---|----------------------|-----------------------|--------------------------|
| 474 | N | <i>Conus</i>         | <i>stimpsoni</i>      | Vermivore                |
| 475 | N | <i>Conus</i>         | <i>sulcocastaneus</i> | Vermivore                |
| 476 | N | <i>Conus</i>         | <i>suratensis</i>     | Vermivore                |
| 477 | N | <i>Conus</i>         | <i>swainsoni</i>      | Vermivore                |
| 478 | N | <i>Conus</i>         | <i>tacomae</i>        | Vermivore                |
| 479 | N | <i>Conus</i>         | <i>terryni</i>        | Vermivore                |
| 480 | N | <i>Conus</i>         | <i>theriaultii</i>    | Vermivore                |
| 481 | N | <i>Conus</i>         | <i>tisii</i>          | Vermivore                |
| 482 | N | <i>Conus</i>         | <i>tostesi</i>        | Vermivore                |
| 483 | N | <i>Conus</i>         | <i>trencarti</i>      | Vermivore                |
| 484 | N | <i>Conus</i>         | <i>trigonus</i>       | Vermivore                |
| 485 | N | <i>Conus</i>         | <i>typhon</i>         | Vermivore                |
| 486 | N | <i>Conus</i>         | <i>umbelinae</i>      | Vermivore                |
| 487 | N | <i>Conus</i>         | <i>vayssierei</i>     | Vermivore                |
| 488 | N | <i>Conus</i>         | <i>venezuelanus</i>   | Vermivore                |
| 489 | N | <i>Conus</i>         | <i>vikingorum</i>     | Vermivore                |
| 490 | N | <i>Conus</i>         | <i>visagenus</i>      | Vermivore                |
| 491 | N | <i>Conus</i>         | <i>wallangra</i>      | Vermivore                |
| 492 | N | <i>Conus</i>         | <i>wandae</i>         | Vermivore                |
| 493 | N | <i>Conus</i>         | <i>wittigi</i>        | Vermivore                |
| 494 | N | <i>Conus</i>         | <i>xanthicus</i>      | Vermivore                |
| 495 | N | <i>Conus</i>         | <i>xanthocinctus</i>  | Vermivore                |
| 496 | N | <i>Profundiconus</i> | <i>teramachii</i>     | Vermivore                |
| 497 | Y | <i>Conus</i>         | <i>mappa</i>          | Vermivore / Molluscivore |
| 498 | Y | <i>Conus</i>         | <i>nobilis</i>        | Vermivore / Molluscivore |
| 499 | Y | <i>Conus</i>         | <i>nussatella</i>     | Vermivore / Molluscivore |
| 500 | N | <i>Conus</i>         | <i>ambiguus</i>       | Vermivore / Molluscivore |
| 501 | N | <i>Conus</i>         | <i>royaikenii</i>     | Vermivore / Molluscivore |
| 502 | N | <i>Conus</i>         | <i>sydneyensis</i>    | Vermivore / Molluscivore |
| 503 | Y | <i>Conus</i>         | <i>blanfordianus</i>  | Vermivore / Piscivore    |
| 504 | Y | <i>Conus</i>         | <i>bruuni</i>         | Vermivore / Piscivore    |
| 505 | Y | <i>Conus</i>         | <i>eburneus</i>       | Vermivore / Piscivore    |



|     |   |                       |                          |                       |
|-----|---|-----------------------|--------------------------|-----------------------|
| 506 | Y | <i>Conus</i>          | <i>kinoshitai</i>        | Vermivore / Piscivore |
| 507 | Y | <i>Conus</i>          | <i>laterculatus</i>      | Vermivore / Piscivore |
| 508 | Y | <i>Conus</i>          | <i>moluccensis</i>       | Vermivore / Piscivore |
| 509 | Y | <i>Conus</i>          | <i>pergrandis</i>        | Vermivore / Piscivore |
| 510 | Y | <i>Conus</i>          | <i>radiatus</i>          | Vermivore / Piscivore |
| 511 | Y | <i>Conus</i>          | <i>rolani</i>            | Vermivore / Piscivore |
| 512 | Y | <i>Conus</i>          | <i>tessulatus</i>        | Vermivore / Piscivore |
| 513 | N | <i>Conus</i>          | <i>ciderryi</i>          | Vermivore / Piscivore |
| 514 | N | <i>Conus</i>          | <i>erythraeensis</i>     | Vermivore / Piscivore |
| 515 | N | <i>Conus</i>          | <i>granulatus</i>        | Vermivore / Piscivore |
| 516 | N | <i>Conus</i>          | <i>kiicumulus</i>        | Vermivore / Piscivore |
| 517 | N | <i>Conus</i>          | <i>nigromaculatus</i>    | Vermivore / Piscivore |
| 518 | Y | <i>Californiconus</i> | <i>californicus</i>      | VMP                   |
| 519 | N | <i>Conus</i>          | <i>alatus</i>            | nomen dubium          |
| 520 | N | <i>Conus</i>          | <i>albidus</i>           | nomen dubium          |
| 521 | N | <i>Conus</i>          | <i>amethysteus</i>       | nomen dubium          |
| 522 | Y | <i>Conus</i>          | <i>biliosus parvulus</i> |                       |
| 523 | Y | <i>Conasprella</i>    | <i>alisi</i>             |                       |
| 524 | Y | <i>Conasprella</i>    | <i>boholensis</i>        |                       |
| 525 | Y | <i>Conasprella</i>    | <i>boucheti</i>          |                       |
| 526 | Y | <i>Conasprella</i>    | <i>coriolisi</i>         |                       |
| 527 | Y | <i>Conasprella</i>    | <i>elokismenos</i>       |                       |
| 528 | Y | <i>Conasprella</i>    | <i>ione</i>              |                       |
| 529 | Y | <i>Conasprella</i>    | <i>jolivetii</i>         |                       |
| 530 | Y | <i>Conasprella</i>    | <i>mahogani</i>          |                       |
| 531 | Y | <i>Conasprella</i>    | <i>pseudorbigny</i>      |                       |
| 532 | Y | <i>Conasprella</i>    | <i>sieboldii</i>         |                       |
| 533 | Y | <i>Conasprella</i>    | <i>ximenes</i>           |                       |
| 534 | Y | <i>Conus</i>          | <i>andremenezi</i>       |                       |
| 535 | Y | <i>Conus</i>          | <i>chytreus</i>          |                       |
| 536 | Y | <i>Conus</i>          | <i>circumactus</i>       |                       |
| 537 | Y | <i>Conus</i>          | <i>franciscoi</i>        |                       |

|     |   |                      |                        |
|-----|---|----------------------|------------------------|
| 538 | Y | <i>Conus</i>         | <i>fumigatus</i>       |
| 539 | Y | <i>Conus</i>         | <i>hamamotoi</i>       |
| 540 | Y | <i>Conus</i>         | <i>jacarusoi</i>       |
| 541 | Y | <i>Conus</i>         | <i>jourdani</i>        |
| 542 | Y | <i>Conus</i>         | <i>lobitensis</i>      |
| 543 | Y | <i>Conus</i>         | <i>luciae</i>          |
| 544 | Y | <i>Conus</i>         | <i>micropunctatus</i>  |
| 545 | Y | <i>Conus</i>         | <i>miniexcelsus</i>    |
| 546 | Y | <i>Conus</i>         | <i>nimbosus</i>        |
| 547 | Y | <i>Conus</i>         | <i>pseudimperialis</i> |
| 548 | Y | <i>Conus</i>         | <i>pseudonivifer</i>   |
| 549 | Y | <i>Conus</i>         | <i>richardbinghami</i> |
| 550 | Y | <i>Conus</i>         | <i>stupa</i>           |
| 551 | Y | <i>Conus</i>         | <i>trovaii</i>         |
| 552 | Y | <i>Conus</i>         | <i>variegatus</i>      |
| 553 | Y | <i>Conus</i>         | <i>zebroides</i>       |
| 554 | Y | <i>Conus</i>         | <i>zylmanae</i>        |
| 555 | Y | <i>Profundiconus</i> | <i>smirna</i>          |
| 556 | Y | <i>Conasprella</i>   | <i>articulata</i>      |
| 557 | Y | <i>Conasprella</i>   | <i>centurio</i>        |
| 558 | Y | <i>Conasprella</i>   | <i>euconornata</i>     |
| 559 | Y | <i>Conasprella</i>   | <i>lucida</i>          |
| 560 | Y | <i>Conus</i>         | <i>freitasi</i>        |
| 561 | Y | <i>Conus</i>         | <i>tiaratus</i>        |
| 562 | Y | <i>Conus</i>         | <i>franciscanus</i>    |
| 563 | Y | <i>Conus</i>         | <i>hughmorrisoni</i>   |
| 564 | N | <i>Conus</i>         | <i>aliwalensis</i>     |
| 565 | N | <i>Conus</i>         | <i>brandonensis</i>    |
| 566 | N | <i>Conus</i>         | <i>bratcheri</i>       |
| 567 | N | <i>Conus</i>         | <i>cathya</i>          |
| 568 | N | <i>Conus</i>         | <i>chindeensis</i>     |
| 569 | N | <i>Conus</i>         | <i>corbieri</i>        |

|     |   |              |                        |
|-----|---|--------------|------------------------|
| 570 | N | <i>Conus</i> | <i>cymbioides</i>      |
| 571 | N | <i>Conus</i> | <i>easoni</i>          |
| 572 | N | <i>Conus</i> | <i>equiminaensis</i>   |
| 573 | N | <i>Conus</i> | <i>estellae</i>        |
| 574 | N | <i>Conus</i> | <i>eusebioi</i>        |
| 575 | N | <i>Conus</i> | <i>fuscatus</i>        |
| 576 | N | <i>Conus</i> | <i>galeyi</i>          |
| 577 | N | <i>Conus</i> | <i>karubenthos</i>     |
| 578 | N | <i>Conus</i> | <i>leehmani</i>        |
| 579 | N | <i>Conus</i> | <i>maculospira</i>     |
| 580 | N | <i>Conus</i> | <i>marimaris</i>       |
| 581 | N | <i>Conus</i> | <i>markpagei</i>       |
| 582 | N | <i>Conus</i> | <i>marysae</i>         |
| 583 | N | <i>Conus</i> | <i>mascarensis</i>     |
| 584 | N | <i>Conus</i> | <i>micelcharlesi</i>   |
| 585 | N | <i>Conus</i> | <i>mosterti</i>        |
| 586 | N | <i>Conus</i> | <i>norpothi</i>        |
| 587 | N | <i>Conus</i> | <i>nunesi</i>          |
| 588 | N | <i>Conus</i> | <i>paulkersteni</i>    |
| 589 | N | <i>Conus</i> | <i>philiquandoni</i>   |
| 590 | N | <i>Conus</i> | <i>pongo</i>           |
| 591 | N | <i>Conus</i> | <i>potiguar</i>        |
| 592 | N | <i>Conus</i> | <i>pseudocodonulli</i> |
| 593 | N | <i>Conus</i> | <i>quasidaucus</i>     |
| 594 | N | <i>Conus</i> | <i>sanderi</i>         |
| 595 | N | <i>Conus</i> | <i>scabriusculus</i>   |
| 596 | N | <i>Conus</i> | <i>severinae</i>       |
| 597 | N | <i>Conus</i> | <i>sugillatus</i>      |
| 598 | N | <i>Conus</i> | <i>taitensis</i>       |
| 599 | N | <i>Conus</i> | <i>tenorioi</i>        |
| 600 | N | <i>Conus</i> | <i>thailandis</i>      |
| 601 | N | <i>Conus</i> | <i>vezoi</i>           |

|     |   |                    |                    |
|-----|---|--------------------|--------------------|
| 602 | N | <i>Conasprella</i> | <i>tirardi</i>     |
| 603 | N | <i>Conus</i>       | <i>albellus</i>    |
| 604 | N | <i>Conus</i>       | <i>algoensis</i>   |
| 605 | N | <i>Conus</i>       | <i>allaryi</i>     |
| 606 | N | <i>Conus</i>       | <i>anabelae</i>    |
| 607 | N | <i>Conus</i>       | <i>athenae</i>     |
| 608 | N | <i>Conus</i>       | <i>attenuatus</i>  |
| 609 | N | <i>Conus</i>       | <i>aurantius</i>   |
| 610 | N | <i>Conus</i>       | <i>axelrodi</i>    |
| 611 | N | <i>Conus</i>       | <i>babaensis</i>   |
| 612 | N | <i>Conus</i>       | <i>bairstowi</i>   |
| 613 | N | <i>Conus</i>       | <i>beatrix</i>     |
| 614 | N | <i>Conus</i>       | <i>berdulinus</i>  |
| 615 | N | <i>Conus</i>       | <i>bocagei</i>     |
| 616 | N | <i>Conus</i>       | <i>bondarevi</i>   |
| 617 | N | <i>Conus</i>       | <i>brianhayesi</i> |
| 618 | N | <i>Conus</i>       | <i>bulbus</i>      |
| 619 | N | <i>Conus</i>       | <i>cardinalis</i>  |
| 620 | N | <i>Conus</i>       | <i>carnalis</i>    |
| 621 | N | <i>Conus</i>       | <i>caysalensis</i> |
| 622 | N | <i>Conus</i>       | <i>cepasi</i>      |
| 623 | N | <i>Conus</i>       | <i>coccineus</i>   |
| 624 | N | <i>Conus</i>       | <i>crosnieri</i>   |
| 625 | N | <i>Conus</i>       | <i>cumingii</i>    |
| 626 | N | <i>Conus</i>       | <i>danilai</i>     |
| 627 | N | <i>Conus</i>       | <i>dedonderi</i>   |
| 628 | N | <i>Conus</i>       | <i>deynzerorum</i> |
| 629 | N | <i>Conus</i>       | <i>dianthus</i>    |
| 630 | N | <i>Conus</i>       | <i>dominicanus</i> |
| 631 | N | <i>Conus</i>       | <i>donnae</i>      |
| 632 | N | <i>Conus</i>       | <i>duffy</i>       |
| 633 | N | <i>Conus</i>       | <i>edwardpauli</i> |

|     |   |              |                       |
|-----|---|--------------|-----------------------|
| 634 | N | <i>Conus</i> | <i>eleutheraensis</i> |
| 635 | N | <i>Conus</i> | <i>empressae</i>      |
| 636 | N | <i>Conus</i> | <i>encaustus</i>      |
| 637 | N | <i>Conus</i> | <i>exiguus</i>        |
| 638 | N | <i>Conus</i> | <i>explorator</i>     |
| 639 | N | <i>Conus</i> | <i>filmeri</i>        |
| 640 | N | <i>Conus</i> | <i>flavusalbus</i>    |
| 641 | N | <i>Conus</i> | <i>fuscolineatus</i>  |
| 642 | N | <i>Conus</i> | <i>gradatulus</i>     |
| 643 | N | <i>Conus</i> | <i>granarius</i>      |
| 644 | N | <i>Conus</i> | <i>gratacapii</i>     |
| 645 | N | <i>Conus</i> | <i>hanshassi</i>      |
| 646 | N | <i>Conus</i> | <i>harasewychi</i>    |
| 647 | N | <i>Conus</i> | <i>harlandi</i>       |
| 648 | N | <i>Conus</i> | <i>havanensis</i>     |
| 649 | N | <i>Conus</i> | <i>ignotus</i>        |
| 650 | N | <i>Conus</i> | <i>inconstans</i>     |
| 651 | N | <i>Conus</i> | <i>inesae</i>         |
| 652 | N | <i>Conus</i> | <i>julieandreae</i>   |
| 653 | N | <i>Conus</i> | <i>kalafuti</i>       |
| 654 | N | <i>Conus</i> | <i>kirkandersi</i>    |
| 655 | N | <i>Conus</i> | <i>kulkulcan</i>      |
| 656 | N | <i>Conus</i> | <i>lecourtorum</i>    |
| 657 | N | <i>Conus</i> | <i>levis</i>          |
| 658 | N | <i>Conus</i> | <i>lineopunctatus</i> |
| 659 | N | <i>Conus</i> | <i>lucaya</i>         |
| 660 | N | <i>Conus</i> | <i>maculiferus</i>    |
| 661 | N | <i>Conus</i> | <i>magellanicus</i>   |
| 662 | N | <i>Conus</i> | <i>magnottei</i>      |
| 663 | N | <i>Conus</i> | <i>maldivus</i>       |
| 664 | N | <i>Conus</i> | <i>marileae</i>       |
| 665 | N | <i>Conus</i> | <i>medvedevi</i>      |

|     |   |              |                         |
|-----|---|--------------|-------------------------|
| 666 | N | <i>Conus</i> | <i>milesi</i>           |
| 667 | N | <i>Conus</i> | <i>minnamurra</i>       |
| 668 | N | <i>Conus</i> | <i>monicae</i>          |
| 669 | N | <i>Conus</i> | <i>montillai</i>        |
| 670 | N | <i>Conus</i> | <i>naranjus</i>         |
| 671 | N | <i>Conus</i> | <i>negroides</i>        |
| 672 | N | <i>Conus</i> | <i>nobrei</i>           |
| 673 | N | <i>Conus</i> | <i>ortneri</i>          |
| 674 | N | <i>Conus</i> | <i>peli</i>             |
| 675 | N | <i>Conus</i> | <i>petuchi</i>          |
| 676 | N | <i>Conus</i> | <i>polongimarumai</i>   |
| 677 | N | <i>Conus</i> | <i>pseudaurantius</i>   |
| 678 | N | <i>Conus</i> | <i>pseudocardinalis</i> |
| 679 | N | <i>Conus</i> | <i>rawaiensis</i>       |
| 680 | N | <i>Conus</i> | <i>rizali</i>           |
| 681 | N | <i>Conus</i> | <i>rosalindensis</i>    |
| 682 | N | <i>Conus</i> | <i>rosi</i>             |
| 683 | N | <i>Conus</i> | <i>sahlbergi</i>        |
| 684 | N | <i>Conus</i> | <i>sanguineus</i>       |
| 685 | N | <i>Conus</i> | <i>scalarispira</i>     |
| 686 | N | <i>Conus</i> | <i>scopulorum</i>       |
| 687 | N | <i>Conus</i> | <i>solidus</i>          |
| 688 | N | <i>Conus</i> | <i>sphacelatus</i>      |
| 689 | N | <i>Conus</i> | <i>spiceri</i>          |
| 690 | N | <i>Conus</i> | <i>splendidulus</i>     |
| 691 | N | <i>Conus</i> | <i>stanfieldi</i>       |
| 692 | N | <i>Conus</i> | <i>stupella</i>         |
| 693 | N | <i>Conus</i> | <i>suduirauti</i>       |
| 694 | N | <i>Conus</i> | <i>sukhadwalai</i>      |
| 695 | N | <i>Conus</i> | <i>tenullineatus</i>    |
| 696 | N | <i>Conus</i> | <i>tethys</i>           |
| 697 | N | <i>Conus</i> | <i>theodorei</i>        |

|     |   |                    |                           |
|-----|---|--------------------|---------------------------|
| 698 | N | <i>Conus</i>       | <i>troendlei</i>          |
| 699 | N | <i>Conus</i>       | <i>tuticorinensis</i>     |
| 700 | N | <i>Conus</i>       | <i>vautieri</i>           |
| 701 | N | <i>Conus</i>       | <i>velaensis</i>          |
| 702 | N | <i>Conus</i>       | <i>wilsi</i>              |
| 703 | N | <i>Conus</i>       | <i>ziczac</i>             |
| 704 | N | <i>Conasprella</i> | <i>aculeiformis</i>       |
| 705 | N | <i>Conasprella</i> | <i>acutimarginata</i>     |
| 706 | N | <i>Conasprella</i> | <i>agassizi</i>           |
| 707 | N | <i>Conasprella</i> | <i>alexandremonteiroi</i> |
| 708 | N | <i>Conasprella</i> | <i>allamandi</i>          |
| 709 | N | <i>Conasprella</i> | <i>anacarolinae</i>       |
| 710 | N | <i>Conasprella</i> | <i>anaglyptica</i>        |
| 711 | N | <i>Conasprella</i> | <i>arawak</i>             |
| 712 | N | <i>Conasprella</i> | <i>armiger</i>            |
| 713 | N | <i>Conasprella</i> | <i>baccata</i>            |
| 714 | N | <i>Conasprella</i> | <i>bajanensis</i>         |
| 715 | N | <i>Conasprella</i> | <i>bermudensis</i>        |
| 716 | N | <i>Conasprella</i> | <i>berschaueri</i>        |
| 717 | N | <i>Conasprella</i> | <i>bodarti</i>            |
| 718 | N | <i>Conasprella</i> | <i>booti</i>              |
| 719 | N | <i>Conasprella</i> | <i>boriqua</i>            |
| 720 | N | <i>Conasprella</i> | <i>bozzettii</i>          |
| 721 | N | <i>Conasprella</i> | <i>branhamae</i>          |
| 722 | N | <i>Conasprella</i> | <i>carlagrezziae</i>      |
| 723 | N | <i>Conasprella</i> | <i>carvalhoi</i>          |
| 724 | N | <i>Conasprella</i> | <i>chaac</i>              |
| 725 | N | <i>Conasprella</i> | <i>chinchorroensis</i>    |
| 726 | N | <i>Conasprella</i> | <i>coromandelica</i>      |
| 727 | N | <i>Conasprella</i> | <i>crabosi</i>            |
| 728 | N | <i>Conasprella</i> | <i>culebrana</i>          |
| 729 | N | <i>Conasprella</i> | <i>damasoi</i>            |

|     |   |                    |                        |
|-----|---|--------------------|------------------------|
| 730 | N | <i>Conasprella</i> | <i>damasomonteiroi</i> |
| 731 | N | <i>Conasprella</i> | <i>delucaii</i>        |
| 732 | N | <i>Conasprella</i> | <i>dictator</i>        |
| 733 | N | <i>Conasprella</i> | <i>dieteri</i>         |
| 734 | N | <i>Conasprella</i> | <i>edpetuchi</i>       |
| 735 | N | <i>Conasprella</i> | <i>elegans</i>         |
| 736 | N | <i>Conasprella</i> | <i>emarginata</i>      |
| 737 | N | <i>Conasprella</i> | <i>ericmonnieri</i>    |
| 738 | N | <i>Conasprella</i> | <i>exumaensis</i>      |
| 739 | N | <i>Conasprella</i> | <i>fenzani</i>         |
| 740 | N | <i>Conasprella</i> | <i>ferreirai</i>       |
| 741 | N | <i>Conasprella</i> | <i>fijiensis</i>       |
| 742 | N | <i>Conasprella</i> | <i>fluviamaris</i>     |
| 743 | N | <i>Conasprella</i> | <i>gattegnoi</i>       |
| 744 | N | <i>Conasprella</i> | <i>geeraertsi</i>      |
| 745 | N | <i>Conasprella</i> | <i>gordyi</i>          |
| 746 | N | <i>Conasprella</i> | <i>grohi</i>           |
| 747 | N | <i>Conasprella</i> | <i>henckesi</i>        |
| 748 | N | <i>Conasprella</i> | <i>herndli</i>         |
| 749 | N | <i>Conasprella</i> | <i>howelli</i>         |
| 750 | N | <i>Conasprella</i> | <i>iansa</i>           |
| 751 | N | <i>Conasprella</i> | <i>icapui</i>          |
| 752 | N | <i>Conasprella</i> | <i>insculpta</i>       |
| 753 | N | <i>Conasprella</i> | <i>itapua</i>          |
| 754 | N | <i>Conasprella</i> | <i>ixchel</i>          |
| 755 | N | <i>Conasprella</i> | <i>janapatriceae</i>   |
| 756 | N | <i>Conasprella</i> | <i>janowskyae</i>      |
| 757 | N | <i>Conasprella</i> | <i>jaspidea</i>        |
| 758 | N | <i>Conasprella</i> | <i>joanae</i>          |
| 759 | N | <i>Conasprella</i> | <i>josei</i>           |
| 760 | N | <i>Conasprella</i> | <i>kantangana</i>      |
| 761 | N | <i>Conasprella</i> | <i>kellyae</i>         |



|     |   |                    |                            |
|-----|---|--------------------|----------------------------|
| 762 | N | <i>Conasprella</i> | <i>keppensi</i>            |
| 763 | N | <i>Conasprella</i> | <i>kohni</i>               |
| 764 | N | <i>Conasprella</i> | <i>lapulapui</i>           |
| 765 | N | <i>Conasprella</i> | <i>lemuriana</i>           |
| 766 | N | <i>Conasprella</i> | <i>lenhilli</i>            |
| 767 | N | <i>Conasprella</i> | <i>levenensis</i>          |
| 768 | N | <i>Conasprella</i> | <i>lindapowersae</i>       |
| 769 | N | <i>Conasprella</i> | <i>lizarum</i>             |
| 770 | N | <i>Conasprella</i> | <i>lorenzi</i>             |
| 771 | N | <i>Conasprella</i> | <i>lusca</i>               |
| 772 | N | <i>Conasprella</i> | <i>mackintoshi</i>         |
| 773 | N | <i>Conasprella</i> | <i>marcusi</i>             |
| 774 | N | <i>Conasprella</i> | <i>marinae</i>             |
| 775 | N | <i>Conasprella</i> | <i>masinoi</i>             |
| 776 | N | <i>Conasprella</i> | <i>mcgintyi</i>            |
| 777 | N | <i>Conasprella</i> | <i>nereis</i>              |
| 778 | N | <i>Conasprella</i> | <i>nodifera</i>            |
| 779 | N | <i>Conasprella</i> | <i>ogum</i>                |
| 780 | N | <i>Conasprella</i> | <i>olangoensis</i>         |
| 781 | N | <i>Conasprella</i> | <i>oleiniki</i>            |
| 782 | N | <i>Conasprella</i> | <i>pacei</i>               |
| 783 | N | <i>Conasprella</i> | <i>paumotu</i>             |
| 784 | N | <i>Conasprella</i> | <i>pealii</i>              |
| 785 | N | <i>Conasprella</i> | <i>pepeiu</i>              |
| 786 | N | <i>Conasprella</i> | <i>pfluegeri</i>           |
| 787 | N | <i>Conasprella</i> | <i>philippequiquandoni</i> |
| 788 | N | <i>Conasprella</i> | <i>pomponeti</i>           |
| 789 | N | <i>Conasprella</i> | <i>poremskii</i>           |
| 790 | N | <i>Conasprella</i> | <i>prugnaudorum</i>        |
| 791 | N | <i>Conasprella</i> | <i>pusio</i>               |
| 792 | N | <i>Conasprella</i> | <i>rachelae</i>            |
| 793 | N | <i>Conasprella</i> | <i>rainesae</i>            |

|     |   |                    |                       |
|-----|---|--------------------|-----------------------|
| 794 | N | <i>Conasprella</i> | <i>ramalhoi</i>       |
| 795 | N | <i>Conasprella</i> | <i>ramosorum</i>      |
| 796 | N | <i>Conasprella</i> | <i>raoulensis</i>     |
| 797 | N | <i>Conasprella</i> | <i>roatanensis</i>    |
| 798 | N | <i>Conasprella</i> | <i>roberti</i>        |
| 799 | N | <i>Conasprella</i> | <i>rutila</i>         |
| 800 | N | <i>Conasprella</i> | <i>saecularis</i>     |
| 801 | N | <i>Conasprella</i> | <i>sargenti</i>       |
| 802 | N | <i>Conasprella</i> | <i>sauros</i>         |
| 803 | N | <i>Conasprella</i> | <i>scaripha</i>       |
| 804 | N | <i>Conasprella</i> | <i>schirrmeisteri</i> |
| 805 | N | <i>Conasprella</i> | <i>serafimi</i>       |
| 806 | N | <i>Conasprella</i> | <i>simonei</i>        |
| 807 | N | <i>Conasprella</i> | <i>somalica</i>       |
| 808 | N | <i>Conasprella</i> | <i>stocki</i>         |
| 809 | N | <i>Conasprella</i> | <i>tammymyersae</i>   |
| 810 | N | <i>Conasprella</i> | <i>tayrona</i>        |
| 811 | N | <i>Conasprella</i> | <i>tiki</i>           |
| 812 | N | <i>Conasprella</i> | <i>toincabrali</i>    |
| 813 | N | <i>Conasprella</i> | <i>torensis</i>       |
| 814 | N | <i>Conasprella</i> | <i>traceyi</i>        |
| 815 | N | <i>Conasprella</i> | <i>valianti</i>       |
| 816 | N | <i>Conasprella</i> | <i>vanhyingi</i>      |
| 817 | N | <i>Conasprella</i> | <i>vantwoudti</i>     |
| 818 | N | <i>Conasprella</i> | <i>verrucosa</i>      |
| 819 | N | <i>Conasprella</i> | <i>wendrosi</i>       |
| 820 | N | <i>Conus</i>       | <i>adami</i>          |
| 821 | N | <i>Conus</i>       | <i>adenensis</i>      |
| 822 | N | <i>Conus</i>       | <i>admirationis</i>   |
| 823 | N | <i>Conus</i>       | <i>aequiquadratus</i> |
| 824 | N | <i>Conus</i>       | <i>aito</i>           |
| 825 | N | <i>Conus</i>       | <i>alfi</i>           |

|     |   |              |                          |
|-----|---|--------------|--------------------------|
| 826 | N | <i>Conus</i> | <i>alrobini</i>          |
| 827 | N | <i>Conus</i> | <i>amplus</i>            |
| 828 | N | <i>Conus</i> | <i>annegretae</i>        |
| 829 | N | <i>Conus</i> | <i>ariejoostei</i>       |
| 830 | N | <i>Conus</i> | <i>aureopunctatus</i>    |
| 831 | N | <i>Conus</i> | <i>brunneofilaris</i>    |
| 832 | N | <i>Conus</i> | <i>caillaudi</i>         |
| 833 | N | <i>Conus</i> | <i>cargilei</i>          |
| 834 | N | <i>Conus</i> | <i>carioca</i>           |
| 835 | N | <i>Conus</i> | <i>castaneus</i>         |
| 836 | N | <i>Conus</i> | <i>ceruttii</i>          |
| 837 | N | <i>Conus</i> | <i>cingulatus</i>        |
| 838 | N | <i>Conus</i> | <i>colombianus</i>       |
| 839 | N | <i>Conus</i> | <i>daphne</i>            |
| 840 | N | <i>Conus</i> | <i>darkini</i>           |
| 841 | N | <i>Conus</i> | <i>devorsinei</i>        |
| 842 | N | <i>Conus</i> | <i>dispar</i>            |
| 843 | N | <i>Conus</i> | <i>ednae</i>             |
| 844 | N | <i>Conus</i> | <i>ernesti</i>           |
| 845 | N | <i>Conus</i> | <i>evansi</i>            |
| 846 | N | <i>Conus</i> | <i>flamingo</i>          |
| 847 | N | <i>Conus</i> | <i>fonsecai</i>          |
| 848 | N | <i>Conus</i> | <i>furnae</i>            |
| 849 | N | <i>Conus</i> | <i>galeao</i>            |
| 850 | N | <i>Conus</i> | <i>garciai</i>           |
| 851 | N | <i>Conus</i> | <i>gibsonsmithorum</i>   |
| 852 | N | <i>Conus</i> | <i>guanahacabibensis</i> |
| 853 | N | <i>Conus</i> | <i>hoarui</i>            |
| 854 | N | <i>Conus</i> | <i>honkerorum</i>        |
| 855 | N | <i>Conus</i> | <i>indomaris</i>         |
| 856 | N | <i>Conus</i> | <i>keatii</i>            |
| 857 | N | <i>Conus</i> | <i>kerstitchi</i>        |

|     |   |              |                        |
|-----|---|--------------|------------------------|
| 858 | N | <i>Conus</i> | <i>kostini</i>         |
| 859 | N | <i>Conus</i> | <i>largilliertii</i>   |
| 860 | N | <i>Conus</i> | <i>malabaricus</i>     |
| 861 | N | <i>Conus</i> | <i>malcolmi</i>        |
| 862 | N | <i>Conus</i> | <i>mariaodeteae</i>    |
| 863 | N | <i>Conus</i> | <i>minimus</i>         |
| 864 | N | <i>Conus</i> | <i>moncuri</i>         |
| 865 | N | <i>Conus</i> | <i>monilifer</i>       |
| 866 | N | <i>Conus</i> | <i>moolenbeeki</i>     |
| 867 | N | <i>Conus</i> | <i>mperjatiensis</i>   |
| 868 | N | <i>Conus</i> | <i>mulderi</i>         |
| 869 | N | <i>Conus</i> | <i>nahoonensis</i>     |
| 870 | N | <i>Conus</i> | <i>nocturnus</i>       |
| 871 | N | <i>Conus</i> | <i>norai</i>           |
| 872 | N | <i>Conus</i> | <i>nybakkeni</i>       |
| 873 | N | <i>Conus</i> | <i>ostrinus</i>        |
| 874 | N | <i>Conus</i> | <i>paraguana</i>       |
| 875 | N | <i>Conus</i> | <i>paschalli</i>       |
| 876 | N | <i>Conus</i> | <i>patglicksteinae</i> |
| 877 | N | <i>Conus</i> | <i>paulae</i>          |
| 878 | N | <i>Conus</i> | <i>pauperculus</i>     |
| 879 | N | <i>Conus</i> | <i>petestimpsoni</i>   |
| 880 | N | <i>Conus</i> | <i>pica</i>            |
| 881 | N | <i>Conus</i> | <i>pomareae</i>        |
| 882 | N | <i>Conus</i> | <i>purissimus</i>      |
| 883 | N | <i>Conus</i> | <i>quasimagus</i>      |
| 884 | N | <i>Conus</i> | <i>regularis</i>       |
| 885 | N | <i>Conus</i> | <i>richardsae</i>      |
| 886 | N | <i>Conus</i> | <i>riosi</i>           |
| 887 | N | <i>Conus</i> | <i>rosemaryae</i>      |
| 888 | N | <i>Conus</i> | <i>ruthae</i>          |
| 889 | N | <i>Conus</i> | <i>santaluziensis</i>  |

|     |   |                      |                       |
|-----|---|----------------------|-----------------------|
| 890 | N | <i>Conus</i>         | <i>scalaris</i>       |
| 891 | N | <i>Conus</i>         | <i>scalarissimus</i>  |
| 892 | N | <i>Conus</i>         | <i>sculletti</i>      |
| 893 | N | <i>Conus</i>         | <i>sennottorum</i>    |
| 894 | N | <i>Conus</i>         | <i>sinaiensis</i>     |
| 895 | N | <i>Conus</i>         | <i>skoglundae</i>     |
| 896 | N | <i>Conus</i>         | <i>smoesi</i>         |
| 897 | N | <i>Conus</i>         | <i>straturatus</i>    |
| 898 | N | <i>Conus</i>         | <i>sunderlandi</i>    |
| 899 | N | <i>Conus</i>         | <i>thevenardensis</i> |
| 900 | N | <i>Conus</i>         | <i>tonisii</i>        |
| 901 | N | <i>Conus</i>         | <i>tristensis</i>     |
| 902 | N | <i>Conus</i>         | <i>urashimanus</i>    |
| 903 | N | <i>Conus</i>         | <i>vanvilstereni</i>  |
| 904 | N | <i>Conus</i>         | <i>velliesi</i>       |
| 905 | N | <i>Conus</i>         | <i>vezzaroi</i>       |
| 906 | N | <i>Conus</i>         | <i>vidua</i>          |
| 907 | N | <i>Conus</i>         | <i>xhosa</i>          |
| 908 | N | <i>Profundiconus</i> | <i>barazeri</i>       |
| 909 | N | <i>Profundiconus</i> | <i>cakobaui</i>       |
| 910 | N | <i>Profundiconus</i> | <i>emersoni</i>       |
| 911 | N | <i>Profundiconus</i> | <i>frausseni</i>      |
| 912 | N | <i>Profundiconus</i> | <i>hennigi</i>        |
| 913 | N | <i>Profundiconus</i> | <i>ikedai</i>         |
| 914 | N | <i>Profundiconus</i> | <i>jeanmartini</i>    |
| 915 | N | <i>Profundiconus</i> | <i>lani</i>           |
| 916 | N | <i>Profundiconus</i> | <i>limpalaeri</i>     |
| 917 | N | <i>Profundiconus</i> | <i>loyaltiensis</i>   |
| 918 | N | <i>Profundiconus</i> | <i>maribelae</i>      |
| 919 | N | <i>Profundiconus</i> | <i>neocaledonicus</i> |
| 920 | N | <i>Profundiconus</i> | <i>neotorquatus</i>   |
| 921 | N | <i>Profundiconus</i> | <i>puillandrei</i>    |

|     |   |                      |                       |
|-----|---|----------------------|-----------------------|
| 922 | N | <i>Profundiconus</i> | <i>robmoolenbeeki</i> |
| 923 | N | <i>Profundiconus</i> | <i>scopulicola</i>    |
| 924 | N | <i>Profundiconus</i> | <i>smirnoides</i>     |
| 925 | N | <i>Profundiconus</i> | <i>stahlschmidtii</i> |
| 926 | N | <i>Profundiconus</i> | <i>tuberculosus</i>   |
| 927 | N | <i>Profundiconus</i> | <i>virginiae</i>      |
| 928 | N | <i>Profundiconus</i> | <i>zardoyai</i>       |
| 929 | N | <i>Profundiconus</i> | <i>tarava</i>         |
| 930 | N | <i>Profundiconus</i> | <i>weii</i>           |

**Table S2** List of *Conus* species contained by the phylogenetic tree

| No. | Genus                 | Species              | No. | Genus        | Species               | No. | Genus        | Species                |
|-----|-----------------------|----------------------|-----|--------------|-----------------------|-----|--------------|------------------------|
| 1   | <i>Californiconus</i> | <i>californicus</i>  | 113 | <i>Conus</i> | <i>crotchii</i>       | 225 | <i>Conus</i> | <i>mitratus</i>        |
| 2   | <i>Profundiconus</i>  | <i>kanakinus</i>     | 114 | <i>Conus</i> | <i>cuneolus</i>       | 226 | <i>Conus</i> | <i>moluccensis</i>     |
| 3   | <i>Profundiconus</i>  | <i>profundorum</i>   | 115 | <i>Conus</i> | <i>curassaviensis</i> | 227 | <i>Conus</i> | <i>monachus</i>        |
| 4   | <i>Profundiconus</i>  | <i>smirna</i>        | 116 | <i>Conus</i> | <i>curralensis</i>    | 228 | <i>Conus</i> | <i>monile</i>          |
| 5   | <i>Profundiconus</i>  | <i>vaubani</i>       | 117 | <i>Conus</i> | <i>cuvieri</i>        | 229 | <i>Conus</i> | <i>moreleti</i>        |
| 6   | <i>Conasprella</i>    | <i>alisi</i>         | 118 | <i>Conus</i> | <i>dalli</i>          | 230 | <i>Conus</i> | <i>mozambicus</i>      |
| 7   | <i>Conasprella</i>    | <i>aphrodite</i>     | 119 | <i>Conus</i> | <i>damottai</i>       | 231 | <i>Conus</i> | <i>mucronatus</i>      |
| 8   | <i>Conasprella</i>    | <i>arcuata</i>       | 120 | <i>Conus</i> | <i>daucus</i>         | 232 | <i>Conus</i> | <i>muriculatus</i>     |
| 9   | <i>Conasprella</i>    | <i>articulata</i>    | 121 | <i>Conus</i> | <i>dayriti</i>        | 233 | <i>Conus</i> | <i>mus</i>             |
| 10  | <i>Conasprella</i>    | <i>baileyi</i>       | 122 | <i>Conus</i> | <i>decoratus</i>      | 234 | <i>Conus</i> | <i>musicus</i>         |
| 11  | <i>Conasprella</i>    | <i>boholensis</i>    | 123 | <i>Conus</i> | <i>delanoyae</i>      | 235 | <i>Conus</i> | <i>mustelinus</i>      |
| 12  | <i>Conasprella</i>    | <i>boucheti</i>      | 124 | <i>Conus</i> | <i>denizi</i>         | 236 | <i>Conus</i> | <i>namocanus</i>       |
| 13  | <i>Conasprella</i>    | <i>centurio</i>      | 125 | <i>Conus</i> | <i>diadema</i>        | 237 | <i>Conus</i> | <i>natalis</i>         |
| 14  | <i>Conasprella</i>    | <i>comatosa</i>      | 126 | <i>Conus</i> | <i>diminutus</i>      | 238 | <i>Conus</i> | <i>navarroii</i>       |
| 15  | <i>Conasprella</i>    | <i>coriolisi</i>     | 127 | <i>Conus</i> | <i>distans</i>        | 239 | <i>Conus</i> | <i>neptunus</i>        |
| 16  | <i>Conasprella</i>    | <i>delessertii</i>   | 128 | <i>Conus</i> | <i>dorotheae</i>      | 240 | <i>Conus</i> | <i>nigrescens</i>      |
| 17  | <i>Conasprella</i>    | <i>elokismenos</i>   | 129 | <i>Conus</i> | <i>dorreenensis</i>   | 241 | <i>Conus</i> | <i>nigropunctatus</i>  |
| 18  | <i>Conasprella</i>    | <i>eucoronata</i>    | 130 | <i>Conus</i> | <i>dusaveli</i>       | 242 | <i>Conus</i> | <i>nimbosus</i>        |
| 19  | <i>Conasprella</i>    | <i>eugrammata</i>    | 131 | <i>Conus</i> | <i>ebraeus</i>        | 243 | <i>Conus</i> | <i>nobilis</i>         |
| 20  | <i>Conasprella</i>    | <i>guidopoppei</i>   | 132 | <i>Conus</i> | <i>eburneus</i>       | 244 | <i>Conus</i> | <i>nucleus</i>         |
| 21  | <i>Conasprella</i>    | <i>hopwoodi</i>      | 133 | <i>Conus</i> | <i>echinophilus</i>   | 245 | <i>Conus</i> | <i>nussatella</i>      |
| 22  | <i>Conasprella</i>    | <i>ichinoseana</i>   | 134 | <i>Conus</i> | <i>emaciatius</i>     | 246 | <i>Conus</i> | <i>nux</i>             |
| 23  | <i>Conasprella</i>    | <i>ione</i>          | 135 | <i>Conus</i> | <i>episcopatus</i>    | 247 | <i>Conus</i> | <i>obscurus</i>        |
| 24  | <i>Conasprella</i>    | <i>joliveti</i>      | 136 | <i>Conus</i> | <i>ermineus</i>       | 248 | <i>Conus</i> | <i>ochroleucus</i>     |
| 25  | <i>Conasprella</i>    | <i>kimioi</i>        | 137 | <i>Conus</i> | <i>eversoni</i>       | 249 | <i>Conus</i> | <i>omaria</i>          |
| 26  | <i>Conasprella</i>    | <i>longurionis</i>   | 138 | <i>Conus</i> | <i>excelsus</i>       | 250 | <i>Conus</i> | <i>orion</i>           |
| 27  | <i>Conasprella</i>    | <i>lucida</i>        | 139 | <i>Conus</i> | <i>eximius</i>        | 251 | <i>Conus</i> | <i>parius</i>          |
| 28  | <i>Conasprella</i>    | <i>mahogani</i>      | 140 | <i>Conus</i> | <i>felitae</i>        | 252 | <i>Conus</i> | <i>parvatus</i>        |
| 29  | <i>Conasprella</i>    | <i>mazei</i>         | 141 | <i>Conus</i> | <i>fergusoni</i>      | 253 | <i>Conus</i> | <i>parvulus</i>        |
| 30  | <i>Conasprella</i>    | <i>memiae</i>        | 142 | <i>Conus</i> | <i>fernandesii</i>    | 254 | <i>Conus</i> | <i>patricius</i>       |
| 31  | <i>Conasprella</i>    | <i>mindana</i>       | 143 | <i>Conus</i> | <i>ferrugineus</i>    | 255 | <i>Conus</i> | <i>pennaceus</i>       |
| 32  | <i>Conasprella</i>    | <i>orbigny</i>       | 144 | <i>Conus</i> | <i>figulinus</i>      | 256 | <i>Conus</i> | <i>pergrandis</i>      |
| 33  | <i>Conasprella</i>    | <i>otohimeae</i>     | 145 | <i>Conus</i> | <i>flavescens</i>     | 257 | <i>Conus</i> | <i>pertusus</i>        |
| 34  | <i>Conasprella</i>    | <i>pagoda</i>        | 146 | <i>Conus</i> | <i>flavidus</i>       | 258 | <i>Conus</i> | <i>philippii</i>       |
| 35  | <i>Conasprella</i>    | <i>perplexa</i>      | 147 | <i>Conus</i> | <i>flavus</i>         | 259 | <i>Conus</i> | <i>pictus</i>          |
| 36  | <i>Conasprella</i>    | <i>pseudokimioi</i>  | 148 | <i>Conus</i> | <i>floccatus</i>      | 260 | <i>Conus</i> | <i>planorbis</i>       |
| 37  | <i>Conasprella</i>    | <i>pseudorbigny</i>  | 149 | <i>Conus</i> | <i>floridulus</i>     | 261 | <i>Conus</i> | <i>plinthis</i>        |
| 38  | <i>Conasprella</i>    | <i>punctulata</i>    | 150 | <i>Conus</i> | <i>franciscanus</i>   | 262 | <i>Conus</i> | <i>poormani</i>        |
| 39  | <i>Conasprella</i>    | <i>sieboldii</i>     | 151 | <i>Conus</i> | <i>franciscoi</i>     | 263 | <i>Conus</i> | <i>praeacellens</i>    |
| 40  | <i>Conasprella</i>    | <i>stearnsii</i>     | 152 | <i>Conus</i> | <i>freitasi</i>       | 264 | <i>Conus</i> | <i>princeps</i>        |
| 41  | <i>Conasprella</i>    | <i>tornata</i>       | 153 | <i>Conus</i> | <i>frigidus</i>       | 265 | <i>Conus</i> | <i>proximus</i>        |
| 42  | <i>Conasprella</i>    | <i>viminea</i>       | 154 | <i>Conus</i> | <i>fumigatus</i>      | 266 | <i>Conus</i> | <i>pseudimperialis</i> |
| 43  | <i>Conasprella</i>    | <i>wakayamaensis</i> | 155 | <i>Conus</i> | <i>furvus</i>         | 267 | <i>Conus</i> | <i>pseudonivifer</i>   |
| 44  | <i>Conasprella</i>    | <i>ximenes</i>       | 156 | <i>Conus</i> | <i>fuscoflavus</i>    | 268 | <i>Conus</i> | <i>pulcher</i>         |
| 45  | <i>Conus</i>          | <i>abbreviatus</i>   | 157 | <i>Conus</i> | <i>gauguini</i>       | 269 | <i>Conus</i> | <i>pulchrius</i>       |

|    |              |                         |     |              |                      |     |              |                        |
|----|--------------|-------------------------|-----|--------------|----------------------|-----|--------------|------------------------|
| 46 | <i>Conus</i> | <i>achatinus</i>        | 158 | <i>Conus</i> | <i>generalis</i>     | 270 | <i>Conus</i> | <i>purpurascens</i>    |
| 47 | <i>Conus</i> | <i>acutangulus</i>      | 159 | <i>Conus</i> | <i>genuanus</i>      | 271 | <i>Conus</i> | <i>queenslandis</i>    |
| 48 | <i>Conus</i> | <i>alconnelli</i>       | 160 | <i>Conus</i> | <i>geographus</i>    | 272 | <i>Conus</i> | <i>quercinus</i>       |
| 49 | <i>Conus</i> | <i>amadis</i>           | 161 | <i>Conus</i> | <i>gladiator</i>     | 273 | <i>Conus</i> | <i>radiatus</i>        |
| 50 | <i>Conus</i> | <i>ammiralis</i>        | 162 | <i>Conus</i> | <i>glans</i>         | 274 | <i>Conus</i> | <i>rattus</i>          |
| 51 | <i>Conus</i> | <i>amphiurgus</i>       | 163 | <i>Conus</i> | <i>gloriamaris</i>   | 275 | <i>Conus</i> | <i>raulsilvai</i>      |
| 52 | <i>Conus</i> | <i>anabathrum</i>       | 164 | <i>Conus</i> | <i>gondwanensis</i>  | 276 | <i>Conus</i> | <i>recurvus</i>        |
| 53 | <i>Conus</i> | <i>andamanensis</i>     | 165 | <i>Conus</i> | <i>gonsaloi</i>      | 277 | <i>Conus</i> | <i>regius</i>          |
| 54 | <i>Conus</i> | <i>andremenezi</i>      | 166 | <i>Conus</i> | <i>gradatus</i>      | 278 | <i>Conus</i> | <i>regonae</i>         |
| 55 | <i>Conus</i> | <i>anemone</i>          | 167 | <i>Conus</i> | <i>grahami</i>       | 279 | <i>Conus</i> | <i>retifer</i>         |
| 56 | <i>Conus</i> | <i>angasi</i>           | 168 | <i>Conus</i> | <i>grangeri</i>      | 280 | <i>Conus</i> | <i>richardbinghami</i> |
| 57 | <i>Conus</i> | <i>antoniaensis</i>     | 169 | <i>Conus</i> | <i>granum</i>        | 281 | <i>Conus</i> | <i>richeri</i>         |
| 58 | <i>Conus</i> | <i>antoniomonteiroi</i> | 170 | <i>Conus</i> | <i>guanche</i>       | 282 | <i>Conus</i> | <i>roeckeli</i>        |
| 59 | <i>Conus</i> | <i>araneosus</i>        | 171 | <i>Conus</i> | <i>gubernator</i>    | 283 | <i>Conus</i> | <i>rolani</i>          |
| 60 | <i>Conus</i> | <i>arangoi</i>          | 172 | <i>Conus</i> | <i>guinaicus</i>     | 284 | <i>Conus</i> | <i>roseorapum</i>      |
| 61 | <i>Conus</i> | <i>archon</i>           | 173 | <i>Conus</i> | <i>hamamotoi</i>     | 285 | <i>Conus</i> | <i>sandwichensis</i>   |
| 62 | <i>Conus</i> | <i>ardisiaceus</i>      | 174 | <i>Conus</i> | <i>hieroglyphus</i>  | 286 | <i>Conus</i> | <i>sanguinolentus</i>  |
| 63 | <i>Conus</i> | <i>arenatus</i>         | 175 | <i>Conus</i> | <i>hirasei</i>       | 287 | <i>Conus</i> | <i>senegalensis</i>    |
| 64 | <i>Conus</i> | <i>aristophanes</i>     | 176 | <i>Conus</i> | <i>hughmorrisoni</i> | 288 | <i>Conus</i> | <i>shikamai</i>        |
| 65 | <i>Conus</i> | <i>ateralbus</i>        | 177 | <i>Conus</i> | <i>imelmani</i>      | 289 | <i>Conus</i> | <i>simonis</i>         |
| 66 | <i>Conus</i> | <i>augur</i>            | 178 | <i>Conus</i> | <i>imperialis</i>    | 290 | <i>Conus</i> | <i>spectrum</i>        |
| 67 | <i>Conus</i> | <i>aulicus</i>          | 179 | <i>Conus</i> | <i>infinitus</i>     | 291 | <i>Conus</i> | <i>sponsalis</i>       |
| 68 | <i>Conus</i> | <i>aureus</i>           | 180 | <i>Conus</i> | <i>infrenatus</i>    | 292 | <i>Conus</i> | <i>spurius</i>         |
| 69 | <i>Conus</i> | <i>auricomus</i>        | 181 | <i>Conus</i> | <i>inscriptus</i>    | 293 | <i>Conus</i> | <i>stercusmuscarum</i> |
| 70 | <i>Conus</i> | <i>aurisiacus</i>       | 182 | <i>Conus</i> | <i>isabelarum</i>    | 294 | <i>Conus</i> | <i>striatellus</i>     |
| 71 | <i>Conus</i> | <i>australis</i>        | 183 | <i>Conus</i> | <i>jacarusoi</i>     | 295 | <i>Conus</i> | <i>striatus</i>        |
| 72 | <i>Conus</i> | <i>balteatus</i>        | 184 | <i>Conus</i> | <i>janus</i>         | 296 | <i>Conus</i> | <i>striolatus</i>      |
| 73 | <i>Conus</i> | <i>bandanus</i>         | 185 | <i>Conus</i> | <i>josephinae</i>    | 297 | <i>Conus</i> | <i>stupa</i>           |
| 74 | <i>Conus</i> | <i>barthelemyi</i>      | 186 | <i>Conus</i> | <i>jourdani</i>      | 298 | <i>Conus</i> | <i>sugimotonis</i>     |
| 75 | <i>Conus</i> | <i>bartschi</i>         | 187 | <i>Conus</i> | <i>jucundus</i>      | 299 | <i>Conus</i> | <i>sulcatus</i>        |
| 76 | <i>Conus</i> | <i>belairensis</i>      | 188 | <i>Conus</i> | <i>judaeus</i>       | 300 | <i>Conus</i> | <i>sutanorcum</i>      |
| 77 | <i>Conus</i> | <i>bengalensis</i>      | 189 | <i>Conus</i> | <i>kinoshitai</i>    | 301 | <i>Conus</i> | <i>suturatus</i>       |
| 78 | <i>Conus</i> | <i>betulinus</i>        | 190 | <i>Conus</i> | <i>kintoki</i>       | 302 | <i>Conus</i> | <i>tabidus</i>         |
| 79 | <i>Conus</i> | <i>bilius</i>           | 191 | <i>Conus</i> | <i>klemae</i>        | 303 | <i>Conus</i> | <i>taeniatus</i>       |
| 80 | <i>Conus</i> | <i>blanfordianus</i>    | 192 | <i>Conus</i> | <i>koukae</i>        | 304 | <i>Conus</i> | <i>tenuistriatus</i>   |
| 81 | <i>Conus</i> | <i>boavistensis</i>     | 193 | <i>Conus</i> | <i>laterculatus</i>  | 305 | <i>Conus</i> | <i>terebra</i>         |
| 82 | <i>Conus</i> | <i>boeticus</i>         | 194 | <i>Conus</i> | <i>legatus</i>       | 306 | <i>Conus</i> | <i>tessulatus</i>      |
| 83 | <i>Conus</i> | <i>borgesi</i>          | 195 | <i>Conus</i> | <i>lenavati</i>      | 307 | <i>Conus</i> | <i>textile</i>         |
| 84 | <i>Conus</i> | <i>bruguieresi</i>      | 196 | <i>Conus</i> | <i>leopardus</i>     | 308 | <i>Conus</i> | <i>thalassiarchus</i>  |
| 85 | <i>Conus</i> | <i>brunneus</i>         | 197 | <i>Conus</i> | <i>lischkeanus</i>   | 309 | <i>Conus</i> | <i>thomae</i>          |
| 86 | <i>Conus</i> | <i>bruuni</i>           | 198 | <i>Conus</i> | <i>litoglyphus</i>   | 310 | <i>Conus</i> | <i>tiaratus</i>        |
| 87 | <i>Conus</i> | <i>bullatus</i>         | 199 | <i>Conus</i> | <i>litteratus</i>    | 311 | <i>Conus</i> | <i>tinianus</i>        |
| 88 | <i>Conus</i> | <i>buxeus</i>           | 200 | <i>Conus</i> | <i>lividus</i>       | 312 | <i>Conus</i> | <i>tribblei</i>        |
| 89 | <i>Conus</i> | <i>buxeus_loroisii</i>  | 201 | <i>Conus</i> | <i>lobitensis</i>    | 313 | <i>Conus</i> | <i>trochulus</i>       |
| 90 | <i>Conus</i> | <i>byssinus</i>         | 202 | <i>Conus</i> | <i>locumtenens</i>   | 314 | <i>Conus</i> | <i>trovaoi</i>         |
| 91 | <i>Conus</i> | <i>calthae</i>          | 203 | <i>Conus</i> | <i>lohri</i>         | 315 | <i>Conus</i> | <i>tulipa</i>          |
| 92 | <i>Conus</i> | <i>cancellatus</i>      | 204 | <i>Conus</i> | <i>longilineus</i>   | 316 | <i>Conus</i> | <i>unifasciatus</i>    |
| 93 | <i>Conus</i> | <i>canonicus</i>        | 205 | <i>Conus</i> | <i>lozeti</i>        | 317 | <i>Conus</i> | <i>variegatus</i>      |



|     |              |                         |     |              |                       |     |              |                    |
|-----|--------------|-------------------------|-----|--------------|-----------------------|-----|--------------|--------------------|
| 94  | <i>Conus</i> | <i>capitanellus</i>     | 206 | <i>Conus</i> | <i>luciae</i>         | 318 | <i>Conus</i> | <i>varius</i>      |
| 95  | <i>Conus</i> | <i>capitaneus</i>       | 207 | <i>Conus</i> | <i>lugubris</i>       | 319 | <i>Conus</i> | <i>ventricosus</i> |
| 96  | <i>Conus</i> | <i>characteristicus</i> | 208 | <i>Conus</i> | <i>luteus</i>         | 320 | <i>Conus</i> | <i>venulatus</i>   |
| 97  | <i>Conus</i> | <i>catus</i>            | 209 | <i>Conus</i> | <i>lynceus</i>        | 321 | <i>Conus</i> | <i>verdensis</i>   |
| 98  | <i>Conus</i> | <i>cedonulli</i>        | 210 | <i>Conus</i> | <i>madecassinus</i>   | 322 | <i>Conus</i> | <i>vexillum</i>    |
| 99  | <i>Conus</i> | <i>cervus</i>           | 211 | <i>Conus</i> | <i>magnificus</i>     | 323 | <i>Conus</i> | <i>victoriae</i>   |
| 100 | <i>Conus</i> | <i>chaldaeus</i>        | 212 | <i>Conus</i> | <i>magus</i>          | 324 | <i>Conus</i> | <i>villepinii</i>  |
| 101 | <i>Conus</i> | <i>chiangi</i>          | 213 | <i>Conus</i> | <i>maioensis</i>      | 325 | <i>Conus</i> | <i>viola</i>       |
| 102 | <i>Conus</i> | <i>chytreus</i>         | 214 | <i>Conus</i> | <i>mappa</i>          | 326 | <i>Conus</i> | <i>violaceus</i>   |
| 103 | <i>Conus</i> | <i>cinereus</i>         | 215 | <i>Conus</i> | <i>marmoreus</i>      | 327 | <i>Conus</i> | <i>virgatus</i>    |
| 104 | <i>Conus</i> | <i>circumactus</i>      | 216 | <i>Conus</i> | <i>martensi</i>       | 328 | <i>Conus</i> | <i>virgo</i>       |
| 105 | <i>Conus</i> | <i>circumcissus</i>     | 217 | <i>Conus</i> | <i>medoci</i>         | 329 | <i>Conus</i> | <i>vittatus</i>    |
| 106 | <i>Conus</i> | <i>cloveri</i>          | 218 | <i>Conus</i> | <i>melvilli</i>       | 330 | <i>Conus</i> | <i>vitulinus</i>   |
| 107 | <i>Conus</i> | <i>coelinae</i>         | 219 | <i>Conus</i> | <i>mercator</i>       | 331 | <i>Conus</i> | <i>voluminalis</i> |
| 108 | <i>Conus</i> | <i>coffeeae</i>         | 220 | <i>Conus</i> | <i>micropunctatus</i> | 332 | <i>Conus</i> | <i>vulcanus</i>    |
| 109 | <i>Conus</i> | <i>consors</i>          | 221 | <i>Conus</i> | <i>miles</i>          | 333 | <i>Conus</i> | <i>xicoi</i>       |
| 110 | <i>Conus</i> | <i>corallinus</i>       | 222 | <i>Conus</i> | <i>miliaris</i>       | 334 | <i>Conus</i> | <i>zebroides</i>   |
| 111 | <i>Conus</i> | <i>coronatus</i>        | 223 | <i>Conus</i> | <i>miniexcelsus</i>   | 335 | <i>Conus</i> | <i>zeylanicus</i>  |
| 112 | <i>Conus</i> | <i>crocatus</i>         | 224 | <i>Conus</i> | <i>miruchae</i>       | 336 | <i>Conus</i> | <i>zonatus</i>     |
|     |              |                         |     |              |                       | 337 | <i>Conus</i> | <i>zylmanae</i>    |

**Table S3** Raw data of the radar plot input table.

| Species                        | Feeding Habits | Biosamples | Venom Glands | Genomes | Protein Structures | Clinical | Red List |
|--------------------------------|----------------|------------|--------------|---------|--------------------|----------|----------|
| <i>Conus abbreviatus</i>       | Vermivore      | X          |              |         |                    |          |          |
| <i>Conus acutangulus</i>       | Vermivore      | X          |              |         |                    |          |          |
| <i>Conus adamsonii</i>         | Piscivore      | X          |              |         |                    |          |          |
| <i>Conus aemulus</i>           | Vermivore      | X          |              |         |                    |          |          |
| <i>Conus alconelli</i>         | Vermivore      | X          |              |         |                    |          |          |
| <i>Conus allaryi</i>           | -              | X          |              |         |                    |          | X        |
| <i>Conus amadis</i>            | Molluscivore   | X          |              |         | X                  |          |          |
| <i>Conus ammiralis</i>         | Molluscivore   | X          |              |         |                    |          |          |
| <i>Conus amphiurgus</i>        | Vermivore      | X          |              |         |                    |          |          |
| <i>Conus anabathrum</i>        | Vermivore      | X          |              |         |                    |          | X        |
| <i>Conus andremenezi</i>       | -              | X          |              |         |                    |          |          |
| <i>Conus anemone</i>           | Vermivore      | X          |              |         |                    |          |          |
| <i>Conus antoniomonteiroi</i>  | Vermivore      | X          | X            |         |                    |          |          |
| <i>Conus araneosus</i>         | Molluscivore   | X          |              |         | X                  |          |          |
| <i>Conus arangoi</i>           | Vermivore      | X          |              |         |                    |          |          |
| <i>Conus archon</i>            | Vermivore      | X          |              |         |                    |          |          |
| <i>Conus ardisiaceus</i>       | Vermivore      |            |              |         |                    |          | X        |
| <i>Conus arenatus</i>          | Vermivore      | X          | X            |         |                    |          |          |
| <i>Conus aristophanes</i>      | Vermivore      | X          |              |         |                    |          |          |
| <i>Conus armadillo</i>         | Vermivore      | X          |              |         |                    |          |          |
| <i>Conus ateralbus</i>         | Vermivore      | X          |              |         |                    |          | X        |
| <i>Conus atlanticoselvagem</i> | *              |            |              |         |                    |          | X        |
| <i>Conus augur</i>             | Vermivore      | X          |              |         |                    |          |          |
| <i>Conus aulicus</i>           | Molluscivore   | X          |              |         | X                  |          |          |
| <i>Conus aurantius</i>         | -              | X          |              |         |                    |          | X        |
| <i>Conus auricomus</i>         | Molluscivore   | X          |              |         |                    |          |          |
| <i>Conus australis</i>         | Vermivore      | X          |              |         |                    |          |          |
| <i>Conus balteatus</i>         | Vermivore      | X          |              |         |                    |          |          |
| <i>Conus bandanus</i>          | Molluscivore   | X          |              |         |                    |          |          |
| <i>Conus barthelemyi</i>       | Piscivore      | X          |              |         |                    |          |          |

|                               |                          |   |   |   |   |   |
|-------------------------------|--------------------------|---|---|---|---|---|
| <i>Conus bartschi</i>         | Vermivore                | X |   |   |   |   |
| <i>Conus bayani</i>           | Vermivore                | X | X |   |   |   |
| <i>Conus belairensis</i>      | Vermivore                |   |   |   |   | X |
| <i>Conus betulinus</i>        | Vermivore                | X | X | X | X |   |
| <i>Conus biliosus</i>         | -                        | X | X |   |   |   |
| <i>Conus boavistensis</i>     | Vermivore                | X | X |   |   |   |
| <i>Conus boeticus</i>         | Vermivore                | X |   |   |   |   |
| <i>Conus borgesii</i>         | Vermivore                | X |   |   |   |   |
| <i>Conus boschorum</i>        | *                        |   |   |   |   | X |
| <i>Conus boui</i>             | Vermivore                | X |   |   |   |   |
| <i>Conus bruguieresii</i>     | Vermivore                |   |   |   |   | X |
| <i>Conus brunneus</i>         | Vermivore                | X |   |   |   |   |
| <i>Conus bruuni</i>           | Vermivore / Piscivore    | X |   |   |   |   |
| <i>Conus bullatus</i>         | Piscivore / Molluscivore | X |   | X | X |   |
| <i>Conus burryae</i>          | Vermivore                | X |   |   |   |   |
| <i>Conus buxeus</i>           | Vermivore                |   |   |   | X |   |
| <i>Conus byssinus</i>         | Vermivore                | X |   |   |   |   |
| <i>Conus cacao</i>            | *                        |   |   |   |   | X |
| <i>Conus cancellatus</i>      | Vermivore                | X |   |   |   |   |
| <i>Conus canonicus</i>        | Molluscivore             | X |   |   |   |   |
| <i>Conus capitaneus</i>       | Vermivore                | X |   |   |   |   |
| <i>Conus capitaneus</i>       | Vermivore                | X |   |   |   |   |
| <i>Conus characteristicus</i> | Vermivore                | X |   |   |   |   |
| <i>Conus cardinalis</i>       | -                        | X |   |   |   | X |
| <i>Conus catus</i>            | Piscivore                | X |   |   | X |   |
| <i>Conus cedonulli</i>        | Vermivore                | X |   |   |   |   |
| <i>Conus cepasi</i>           | -                        |   |   |   |   | X |
| <i>Conus chaldaeus</i>        | Vermivore                | X |   |   |   |   |
| <i>Conus chiangi</i>          | Vermivore                | X |   |   |   |   |
| <i>Conus cinereus</i>         | Piscivore                | X |   |   |   |   |
| <i>Conus circumactus</i>      | -                        | X |   |   |   |   |
| <i>Conus circumcissus</i>     | Piscivore                | X |   |   |   |   |
| <i>Conus cloveri</i>          | Vermivore                |   |   |   |   | X |

|                             |                       |   |   |   |   |   |
|-----------------------------|-----------------------|---|---|---|---|---|
| <i>Conus cocceus</i>        | Vermivore             | X |   |   |   |   |
| <i>Conus coelinae</i>       | Vermivore             | X |   |   |   |   |
| <i>Conus coffeae</i>        | Vermivore             | X |   |   |   |   |
| <i>Conus compressus</i>     | Vermivore             |   |   |   |   | X |
| <i>Conus consors</i>        | Piscivore             | X | X | X | X |   |
| <i>Conus corallinus</i>     | Vermivore             | X |   |   |   |   |
| <i>Conus coronatus</i>      | Vermivore             | X | X |   |   |   |
| <i>Conus crotchii</i>       | Vermivore             | X |   |   |   | X |
| <i>Conus cuneolus</i>       | Vermivore             | X | X |   |   | X |
| <i>Conus curassaviensis</i> | Vermivore             | X |   |   |   | X |
| <i>Conus curralensis</i>    | Vermivore             |   |   |   |   | X |
| <i>Conus cuvieri</i>        | Piscivore             | X |   |   |   | X |
| <i>Conus dalli</i>          | Molluscivore          | X |   |   |   |   |
| <i>Conus damottai</i>       | Vermivore             | X |   |   |   |   |
| <i>Conus darkini</i>        | -                     | X |   |   |   |   |
| <i>Conus daucus</i>         | Vermivore             | X |   |   |   |   |
| <i>Conus dayriti</i>        | Vermivore             | X |   |   |   |   |
| <i>Conus decoratus</i>      | Vermivore             | X |   |   |   | X |
| <i>Conus delanoyae</i>      | Vermivore             | X |   |   |   |   |
| <i>Conus denizi</i>         | Vermivore             |   |   |   |   | X |
| <i>Conus derrubado</i>      | *                     |   |   |   |   | X |
| <i>Conus diadema</i>        | Vermivore             | X |   |   |   |   |
| <i>Conus diminutus</i>      | Vermivore             | X |   |   |   | X |
| <i>Conus distans</i>        | Vermivore             | X |   |   |   |   |
| <i>Conus dorotheae</i>      | Vermivore             | X |   |   |   | X |
| <i>Conus dorreensis</i>     | Vermivore             | X |   |   |   |   |
| <i>Conus duffyi</i>         | -                     |   |   |   |   | X |
| <i>Conus ebraeus</i>        | Vermivore             | X | X |   |   |   |
| <i>Conus eburneus</i>       | Vermivore / Piscivore | X |   |   |   |   |
| <i>Conus echinophilus</i>   | Vermivore             |   |   |   |   | X |
| <i>Conus emaciatus</i>      | Vermivore             | X |   |   |   |   |
| <i>Conus encaustus</i>      | -                     | X |   |   |   |   |
| <i>Conus episcopatus</i>    | Molluscivore          | X | X |   | X |   |

|                            |                       |   |   |   |   |
|----------------------------|-----------------------|---|---|---|---|
| <i>Conus ermineus</i>      | Piscivore             | X | X | X |   |
| <i>Conus erythraeensis</i> | Vermivore / Piscivore | X |   |   |   |
| <i>Conus evorai</i>        | *                     |   |   |   | X |
| <i>Conus excelsus</i>      | Vermivore             | X |   |   |   |
| <i>Conus explorator</i>    | -                     |   |   |   | X |
| <i>Conus felitae</i>       | Vermivore             |   |   |   | X |
| <i>Conus fergusonii</i>    | Vermivore             | X |   |   |   |
| <i>Conus fernandesi</i>    | Vermivore             |   |   |   | X |
| <i>Conus figulinus</i>     | Vermivore             | X |   |   |   |
| <i>Conus fijiisulcatus</i> | Vermivore             | X |   |   |   |
| <i>Conus flavidus</i>      | Vermivore             | X |   |   |   |
| <i>Conus floccatus</i>     | Piscivore             | X |   |   |   |
| <i>Conus floridulus</i>    | Vermivore             | X |   |   |   |
| <i>Conus fontonae</i>      | *                     |   |   |   | X |
| <i>Conus frigidus</i>      | Vermivore             | X |   |   |   |
| <i>Conus fumigatus</i>     | -                     | X |   |   |   |
| <i>Conus furvus</i>        | Molluscivore          | X |   |   |   |
| <i>Conus fuscoflavus</i>   | Vermivore             | X |   |   |   |
| <i>Conus galeao</i>        | -                     | X | X |   |   |
| <i>Conus gauquini</i>      | Piscivore             | X |   |   | X |
| <i>Conus generalis</i>     | Vermivore             | X |   | X |   |
| <i>Conus geographus</i>    | Piscivore             | X | X | X | X |
| <i>Conus gigasulcatus</i>  | Vermivore             | X |   |   |   |
| <i>Conus gladiator</i>     | Vermivore             | X |   |   |   |
| <i>Conus glans</i>         | Vermivore             | X |   |   |   |
| <i>Conus glaucus</i>       | Vermivore             | X |   |   |   |
| <i>Conus gloriamaris</i>   | Molluscivore          | X | X | X |   |
| <i>Conus gondwanensis</i>  | Vermivore             | X |   |   |   |
| <i>Conus grahami</i>       | Vermivore             | X | X |   |   |
| <i>Conus granulatus</i>    | Vermivore / Piscivore | X |   |   |   |
| <i>Conus granum</i>        | Vermivore             | X |   |   |   |
| <i>Conus guanache</i>      | Vermivore             | X | X |   |   |
| <i>Conus gubernator</i>    | Piscivore             | X |   |   |   |

|                             |                       |   |   |  |   |   |
|-----------------------------|-----------------------|---|---|--|---|---|
| <i>Conus guinaicus</i>      | Vermivore             |   |   |  |   | X |
| <i>Conus hamamotoi</i>      | -                     | X |   |  |   |   |
| <i>Conus henckesi</i>       | -                     |   |   |  |   | X |
| <i>Conus hennequini</i>     | Vermivore             |   |   |  |   | X |
| <i>Conus hieroglyphus</i>   | Vermivore             | X |   |  |   | X |
| <i>Conus hilli</i>          | *                     | X |   |  |   |   |
| <i>Conus hirasei</i>        | Vermivore             | X |   |  |   |   |
| <i>Conus hughmorrisoni</i>  | -                     | X |   |  |   |   |
| <i>Conus hybridus</i>       | *                     | X |   |  |   | X |
| <i>Conus immelmani</i>      | Molluscivore          |   |   |  |   | X |
| <i>Conus imperialis</i>     | Vermivore             | X | X |  | X |   |
| <i>Conus infinitus</i>      | Vermivore             | X | X |  |   |   |
| <i>Conus inscriptus</i>     | Vermivore             |   |   |  | X |   |
| <i>Conus jacarusoi</i>      | -                     | X |   |  |   |   |
| <i>Conus janus</i>          | Vermivore             | X |   |  |   |   |
| <i>Conus jeanmartini</i>    | -                     |   |   |  |   | X |
| <i>Conus josephinae</i>     | Vermivore             |   |   |  |   | X |
| <i>Conus judaeus</i>        | Vermivore             | X |   |  |   |   |
| <i>Conus julii</i>          | Piscivore             |   |   |  |   | X |
| <i>Conus kermadecensis</i>  | Vermivore             | X |   |  |   |   |
| <i>Conus kersteni</i>       | Vermivore             |   |   |  |   | X |
| <i>Conus kinoshitai</i>     | Vermivore / Piscivore |   |   |  | X |   |
| <i>Conus kintoki</i>        | Vermivore             | X |   |  |   |   |
| <i>Conus kirkandersi</i>    | -                     |   |   |  |   | X |
| <i>Conus klemae</i>         | Vermivore             | X |   |  |   |   |
| <i>Conus kuroharai</i>      | Vermivore             | X |   |  |   |   |
| <i>Conus laterculatus</i>   | Vermivore / Piscivore | X |   |  |   |   |
| <i>Conus legatus</i>        | Molluscivore          | X |   |  |   |   |
| <i>Conus lenavati</i>       | Vermivore             | X | X |  |   |   |
| <i>Conus leopardus</i>      | Vermivore             | X |   |  |   |   |
| <i>Conus lineopunctatus</i> | -                     | X |   |  |   |   |
| <i>Conus lischkeanus</i>    | Vermivore             | X |   |  |   |   |
| <i>Conus litoglyphus</i>    | Vermivore             | X |   |  |   |   |

|                               |                           |     |   |  |   |   |
|-------------------------------|---------------------------|-----|---|--|---|---|
| <i>Conus litteratus</i>       | Vermivore                 | X   | X |  |   |   |
| <i>Conus lividus</i>          | Vermivore                 | X   | X |  | X |   |
| <i>Conus locumtenens</i>      | Molluscivore              | X   |   |  |   |   |
| <i>Conus longilineus</i>      | Vermivore                 | X   |   |  |   |   |
| <i>Conus lozeti</i>           | Vermivore                 | X   |   |  |   |   |
| <i>Conus luciae</i>           | -                         | X   |   |  |   |   |
| <i>Conus lugubris</i>         | Vermivore                 |     |   |  |   | X |
| <i>Conus luquei</i>           | *                         |     |   |  |   | X |
| <i>Conus madagascariensis</i> | Molluscivore              | X   |   |  |   |   |
| <i>Conus madecassinus</i>     | Vermivore                 | X   |   |  |   |   |
| <i>Conus magellanicus</i>     | -                         | X   |   |  |   |   |
| <i>Conus magnificus</i>       | Molluscivore              | X   |   |  |   |   |
| <i>Conus magus</i>            | Piscivore                 | X   | X |  | X | X |
| <i>Conus maioensis</i>        | Vermivore                 | X   | X |  |   |   |
| <i>Conus maldivus</i>         | -                         | X   |   |  |   |   |
| <i>Conus mappa</i>            | Vermivore<br>Molluscivore | / X |   |  |   |   |
| <i>Conus marchionatus</i>     | Molluscivore              | X   |   |  |   |   |
| <i>Conus marmoreus</i>        | Molluscivore              | X   | X |  | X | X |
| <i>Conus martensi</i>         | Vermivore                 | X   |   |  |   |   |
| <i>Conus massemmini</i>       | *                         | X   |   |  |   |   |
| <i>Conus mcbridei</i>         | Vermivore                 | X   |   |  |   |   |
| <i>Conus medoci</i>           | Vermivore                 | X   |   |  |   |   |
| <i>Conus melvilli</i>         | Vermivore                 |     |   |  |   | X |
| <i>Conus mercator</i>         | Vermivore                 |     |   |  |   | X |
| <i>Conus micropunctatus</i>   | -                         | X   |   |  |   |   |
| <i>Conus miles</i>            | -                         | X   |   |  | X |   |
| <i>Conus miliaris</i>         | Vermivore                 | X   | X |  |   |   |
| <i>Conus miniexcelsus</i>     | -                         | X   |   |  |   |   |
| <i>Conus miruchae</i>         | Vermivore                 | X   | X |  |   |   |
| <i>Conus moluccensis</i>      | Vermivore / Piscivore     | X   |   |  |   |   |
| <i>Conus monachus</i>         | Piscivore                 | X   |   |  |   |   |
| <i>Conus moncuri</i>          | -                         | X   |   |  |   |   |
| <i>Conus monile</i>           | Vermivore                 | X   |   |  | X |   |

|                           |                           |     |   |
|---------------------------|---------------------------|-----|---|
| <i>Conus mordeirae</i>    | *                         |     | X |
| <i>Conus moreleti</i>     | Vermivore                 | X   |   |
| <i>Conus mucronatus</i>   | Piscivore                 | X   |   |
| <i>Conus muriculatus</i>  | Vermivore                 | X   |   |
| <i>Conus mus</i>          | Vermivore                 | X   |   |
| <i>Conus musicus</i>      | Vermivore                 | X   |   |
| <i>Conus mustelinus</i>   | Vermivore                 | X   |   |
| <i>Conus namocanus</i>    | Vermivore                 | X   |   |
| <i>Conus navarroï</i>     | Vermivore                 |     | X |
| <i>Conus nielsenæ</i>     | Vermivore                 |     | X |
| <i>Conus nimbosus</i>     | -                         | X   |   |
| <i>Conus nobilis</i>      | Vermivore<br>Molluscivore | / X |   |
| <i>Conus nobrei</i>       | -                         |     | X |
| <i>Conus nussatella</i>   | Vermivore<br>Molluscivore | / X |   |
| <i>Conus nux</i>          | Vermivore                 | X   | X |
| <i>Conus obscurus</i>     | Piscivore                 | X   |   |
| <i>Conus ochroleucus</i>  | Vermivore                 | X   |   |
| <i>Conus omaria</i>       | Molluscivore              | X   | X |
| <i>Conus orion</i>        | Vermivore                 | X   |   |
| <i>Conus papilliferus</i> | Vermivore                 | X   |   |
| <i>Conus parius</i>       | Piscivore                 | X   |   |
| <i>Conus patricius</i>    | Vermivore                 | X   |   |
| <i>Conus pennaceus</i>    | Molluscivore              |     | X |
| <i>Conus pergrandis</i>   | Vermivore / Piscivore     | X   |   |
| <i>Conus pertusus</i>     | Vermivore                 | X   |   |
| <i>Conus pictus</i>       | Vermivore                 |     | X |
| <i>Conus pineauï</i>      | *                         | X   |   |
| <i>Conus planorbis</i>    | Vermivore                 | X   | X |
| <i>Conus plinthis</i>     | Vermivore                 | X   |   |
| <i>Conus poormani</i>     | Vermivore                 | X   |   |
| <i>Conus praezellens</i>  | Vermivore                 | X   |   |
| <i>Conus princeps</i>     | Vermivore                 | X   |   |
| <i>Conus proximus</i>     | Piscivore                 | X   |   |



|                              |                       |   |   |   |
|------------------------------|-----------------------|---|---|---|
| <i>Conus pseudimperialis</i> | -                     | X |   |   |
| <i>Conus purpurascens</i>    | Piscivore             | X |   | X |
| <i>Conus queenslandis</i>    | Vermivore             | X |   |   |
| <i>Conus quercinus</i>       | Vermivore             | X | X |   |
| <i>Conus radiatus</i>        | Vermivore / Piscivore |   |   | X |
| <i>Conus rattus</i>          | Vermivore             | X | X |   |
| <i>Conus raulsilvai</i>      | Vermivore             | X | X |   |
| <i>Conus rawaiensis</i>      | -                     |   |   | X |
| <i>Conus recurvus</i>        | Vermivore             | X |   |   |
| <i>Conus regius</i>          | Vermivore             | X |   | X |
| <i>Conus regonae</i>         | Vermivore             | X |   | X |
| <i>Conus retifer</i>         | Molluscivore          | X |   |   |
| <i>Conus richardbinghami</i> | -                     | X |   | X |
| <i>Conus rolani</i>          | Vermivore / Piscivore | X |   | X |
| <i>Conus sakalava</i>        | *                     | X |   |   |
| <i>Conus salreiensis</i>     | *                     |   |   | X |
| <i>Conus sanguinolentus</i>  | Vermivore             | X |   |   |
| <i>Conus saragasae</i>       | Vermivore             |   |   | X |
| <i>Conus shikamai</i>        | Vermivore             | X |   |   |
| <i>Conus sponsalis</i>       | Vermivore             | X | X |   |
| <i>Conus spurius</i>         | Vermivore             | X |   |   |
| <i>Conus spurius</i>         | Vermivore             | X |   |   |
| <i>Conus stearnsii</i>       | Vermivore             |   |   | X |
| <i>Conus stercusmuscarum</i> | Piscivore             | X |   | X |
| <i>Conus stimpsoni</i>       | Vermivore             | X |   |   |
| <i>Conus striatellus</i>     | Vermivore             | X |   |   |
| <i>Conus striatus</i>        | Piscivore             | X | X | X |
| <i>Conus striolatus</i>      | Piscivore             | X |   | X |
| <i>Conus stupa</i>           | -                     | X |   |   |
| <i>Conus sugimotoi</i>       | Vermivore             | X |   |   |
| <i>Conus sulcatus</i>        | Vermivore             | X |   |   |
| <i>Conus sunderlandi</i>     | -                     | X |   |   |
| <i>Conus sutanorcum</i>      | Piscivore             | X |   |   |

|                             |                       |   |   |   |   |   |   |
|-----------------------------|-----------------------|---|---|---|---|---|---|
| <i>Conus tabidus</i>        | Vermivore             | X |   |   |   |   |   |
| <i>Conus tacomae</i>        | Vermivore             |   |   |   |   |   | X |
| <i>Conus taeniatus</i>      | Vermivore             | X |   |   |   |   |   |
| <i>Conus taslei</i>         | *                     |   |   |   |   |   | X |
| <i>Conus teodora</i>        | *                     |   |   |   |   |   | X |
| <i>Conus terebra</i>        | Vermivore             | X | X |   |   |   |   |
| <i>Conus terryi</i>         | Vermivore             |   |   |   |   |   | X |
| <i>Conus tessulatus</i>     | Vermivore / Piscivore | X |   |   |   |   |   |
| <i>Conus textile</i>        | Molluscivore          | X | X |   | X |   |   |
| <i>Conus thevenardensis</i> | *                     |   |   |   |   |   | X |
| <i>Conus tinianus</i>       | Vermivore             | X |   |   |   |   |   |
| <i>Conus trencarti</i>      | Vermivore             |   |   |   |   |   | X |
| <i>Conus tribblei</i>       | Vermivore             | X | X | X |   |   |   |
| <i>Conus trigonus</i>       | Vermivore             | X |   |   |   |   |   |
| <i>Conus trochulus</i>      | Vermivore             | X | X |   |   |   | X |
| <i>Conus troendlei</i>      | -                     | X |   |   |   |   |   |
| <i>Conus tulipa</i>         | Piscivore             | X |   |   | X | X |   |
| <i>Conus unifasciatus</i>   | Vermivore             |   |   |   |   |   | X |
| <i>Conus variegatus</i>     | -                     | X |   |   |   |   |   |
| <i>Conus varius</i>         | Vermivore             | X | X |   |   |   |   |
| <i>Conus vautieri</i>       | -                     | X |   |   |   |   |   |
| <i>Conus ventricosus</i>    | Vermivore             | X |   | X |   |   |   |
| <i>Conus venulatus</i>      | Vermivore             | X |   |   |   |   |   |
| <i>Conus verdensis</i>      | Vermivore             | X | X |   |   |   |   |
| <i>Conus vexillum</i>       | Vermivore             | X | X |   |   |   |   |
| <i>Conus vezoi</i>          | -                     | X |   |   |   |   |   |
| <i>Conus victoriae</i>      | Molluscivore          | X | X |   | X | X |   |
| <i>Conus villeginii</i>     | Vermivore             | X |   |   | X |   |   |
| <i>Conus viola</i>          | Vermivore             | X |   |   |   |   |   |
| <i>Conus virgatus</i>       | Vermivore             | X |   |   |   |   |   |
| <i>Conus virgo</i>          | Vermivore             | X | X |   |   |   |   |
| <i>Conus vittatus</i>       | Vermivore             | X |   |   |   |   |   |
| <i>Conus voluminalis</i>    | Vermivore             | X |   |   |   |   |   |

|                         |           |   |  |   |   |
|-------------------------|-----------|---|--|---|---|
| <i>Conus xicoi</i>      | Vermivore | X |  |   | X |
| <i>Conus zebroides</i>  | -         |   |  |   | X |
| <i>Conus zeylanicus</i> | Vermivore | X |  |   |   |
| <i>Conus zonatus</i>    | Vermivore | X |  | X |   |
| <i>Conus zylmanae</i>   | -         | X |  |   |   |

**Table S4** Input data for the radar plot

|                                                   | Vermivorous (V) | Molluscivorous (M) | Piscivorous (P) | lack of data | Sum |
|---------------------------------------------------|-----------------|--------------------|-----------------|--------------|-----|
| Genome Assembly                                   | 3               | 1                  | 1               | 0            | 5   |
| Species went clinical trial                       | 0               | 2                  | 4               | 0            | 6   |
| Protein Structure                                 | 16              | 11                 | 13              | 1            | 37  |
| Venom Gland                                       | 31              | 5                  | 5               | 2            | 43  |
| Species numbers (overlaps are counted separately) | 368             | 61                 | 100             | 412          | 506 |
| Red list                                          | 37              | 1                  | 3               | 26           | 67  |
